# Supplementary material for: How do the Hückel and Baird Rules Fade away in Annulenes?
Source: MDPI journal article supplement (doi:10.3390/molecules25030711), 2020-02-07
Supplement: s1 [file s1]

**Supporting information:**

Complete optimized geometries (in Å) of the studied  $C_nH_n$  annulene series ( $n=4-18$ , even number) using B3LYP, CAM-B3LYP, M06-2X density functional approximations and HF in combination with the 6-311G(d,p) basis set.

**Table 1.**  $C_4H_4$  singlet optimized with HF:

|   |          |           |           |
|---|----------|-----------|-----------|
| 6 | 0.000000 | 0.658824  | 0.783126  |
| 6 | 0.000000 | 0.658824  | -0.783126 |
| 6 | 0.000000 | -0.658824 | 0.783126  |
| 6 | 0.000000 | -0.658824 | -0.783126 |
| 1 | 0.000000 | 1.419468  | 1.538886  |
| 1 | 0.000000 | 1.419468  | -1.538886 |
| 1 | 0.000000 | -1.419468 | 1.538886  |
| 1 | 0.000000 | -1.419468 | -1.538886 |

**Table 2.**  $C_4H_4$  singlet optimized with B3LYP:

|   |          |           |           |
|---|----------|-----------|-----------|
| 6 | 0.000000 | 0.665797  | 0.789329  |
| 6 | 0.000000 | 0.665797  | -0.789329 |
| 6 | 0.000000 | -0.665797 | 0.789329  |
| 6 | 0.000000 | -0.665797 | -0.789329 |
| 1 | 0.000000 | 1.432935  | 1.551186  |
| 1 | 0.000000 | 1.432935  | -1.551186 |
| 1 | 0.000000 | -1.432935 | 1.551186  |
| 1 | 0.000000 | -1.432935 | -1.551186 |

**Table 3.**  $C_4H_4$  singlet optimized with CAM-B3LYP:

|   |          |           |           |
|---|----------|-----------|-----------|
| 6 | 0.000000 | 0.662972  | 0.785234  |
| 6 | 0.000000 | 0.662972  | -0.785234 |
| 6 | 0.000000 | -0.662972 | 0.785234  |
| 6 | 0.000000 | -0.662972 | -0.785234 |
| 1 | 0.000000 | 1.428243  | 1.547651  |
| 1 | 0.000000 | 1.428243  | -1.547651 |
| 1 | 0.000000 | -1.428243 | 1.547651  |
| 1 | 0.000000 | -1.428243 | -1.547651 |

**Table 4.**  $C_4H_4$  singlet optimized with M06-2X:

|   |          |           |           |
|---|----------|-----------|-----------|
| 6 | 0.000000 | 0.663994  | 0.785233  |
| 6 | 0.000000 | 0.663994  | -0.785233 |
| 6 | 0.000000 | -0.663994 | 0.785233  |
| 6 | 0.000000 | -0.663994 | -0.785233 |
| 1 | 0.000000 | 1.430282  | 1.547110  |
| 1 | 0.000000 | 1.430282  | -1.547110 |
| 1 | 0.000000 | -1.430282 | 1.547110  |

|   |          |           |           |
|---|----------|-----------|-----------|
| 1 | 0.000000 | -1.430282 | -1.547110 |
|---|----------|-----------|-----------|

**Table 5.** C<sub>4</sub>H<sub>4</sub> triplet optimized with UHF:

|   |          |           |           |
|---|----------|-----------|-----------|
| 6 | 0.000000 | 0.713598  | 0.713615  |
| 6 | 0.000000 | 0.713598  | -0.713615 |
| 6 | 0.000000 | -0.713598 | 0.713615  |
| 6 | 0.000000 | -0.713598 | -0.713615 |
| 1 | 0.000000 | 1.471526  | 1.470818  |
| 1 | 0.000000 | 1.471526  | -1.470818 |
| 1 | 0.000000 | -1.471526 | 1.470818  |
| 1 | 0.000000 | -1.471526 | -1.470818 |

**Table 6.** C<sub>4</sub>H<sub>4</sub> triplet optimized with UB3LYP:

|   |          |           |           |
|---|----------|-----------|-----------|
| 6 | 0.000000 | 0.719753  | 0.719835  |
| 6 | 0.000000 | 0.719753  | -0.719835 |
| 6 | 0.000000 | -0.719753 | 0.719835  |
| 6 | 0.000000 | -0.719753 | -0.719835 |
| 1 | 0.000000 | 1.484200  | 1.482506  |
| 1 | 0.000000 | 1.484200  | -1.482506 |
| 1 | 0.000000 | -1.484200 | 1.482506  |
| 1 | 0.000000 | -1.484200 | -1.482506 |

**Table 7.** C<sub>4</sub>H<sub>4</sub> triplet optimized with UCAM-B3LYP:

|   |          |           |           |
|---|----------|-----------|-----------|
| 6 | 0.000000 | 0.716472  | 0.716523  |
| 6 | 0.000000 | 0.716472  | -0.716523 |
| 6 | 0.000000 | -0.716472 | 0.716523  |
| 6 | 0.000000 | -0.716472 | -0.716523 |
| 1 | 0.000000 | 1.480218  | 1.478803  |
| 1 | 0.000000 | 1.480218  | -1.478803 |
| 1 | 0.000000 | -1.480218 | 1.478803  |
| 1 | 0.000000 | -1.480218 | -1.478803 |

**Table 8.** C<sub>4</sub>H<sub>4</sub> triplet optimized with UM06-2X:

|   |          |           |           |
|---|----------|-----------|-----------|
| 6 | 0.000000 | 0.716687  | 0.716738  |
| 6 | 0.000000 | 0.716687  | -0.716738 |
| 6 | 0.000000 | -0.716687 | 0.716738  |
| 6 | 0.000000 | -0.716687 | -0.716738 |
| 1 | 0.000000 | 1.480318  | 1.478820  |
| 1 | 0.000000 | 1.480318  | -1.478820 |
| 1 | 0.000000 | -1.480318 | 1.478820  |
| 1 | 0.000000 | -1.480318 | -1.478820 |

**Table 9.** C<sub>6</sub>H<sub>6</sub> singlet optimized with HF:

|   |          |           |          |
|---|----------|-----------|----------|
| 6 | 1.066021 | -0.884627 | 0.000161 |
|---|----------|-----------|----------|

|   |           |           |           |
|---|-----------|-----------|-----------|
| 6 | -0.233139 | -1.365560 | -0.000275 |
| 6 | 1.299241  | 0.480811  | -0.000061 |
| 1 | -0.414127 | -2.425843 | -0.000362 |
| 1 | 2.307988  | 0.854157  | -0.000469 |
| 6 | -1.299181 | -0.480924 | 0.000073  |
| 6 | 0.233075  | 1.365602  | 0.000005  |
| 1 | -2.307923 | -0.854281 | -0.000027 |
| 1 | 0.414175  | 2.425857  | -0.000413 |
| 6 | -1.066019 | 0.884720  | 0.000189  |
| 1 | -1.893775 | 1.571568  | -0.000133 |
| 1 | 1.893671  | -1.571592 | 0.000857  |

**Table 10.** C<sub>6</sub>H<sub>6</sub> singlet optimized with B3LYP:

|   |          |           |           |
|---|----------|-----------|-----------|
| 6 | 0.000000 | 0.000000  | 1.393968  |
| 6 | 0.000000 | 1.207156  | 0.696959  |
| 6 | 0.000000 | -1.207156 | 0.696959  |
| 1 | 0.000000 | 2.146302  | 1.239153  |
| 1 | 0.000000 | -2.146302 | 1.239153  |
| 6 | 0.000000 | 1.207156  | -0.696959 |
| 6 | 0.000000 | -1.207156 | -0.696959 |
| 1 | 0.000000 | 2.146302  | -1.239153 |
| 1 | 0.000000 | -2.146302 | -1.239153 |
| 6 | 0.000000 | 0.000000  | -1.393968 |
| 1 | 0.000000 | 0.000000  | -2.478381 |
| 1 | 0.000000 | 0.000000  | 2.478381  |

**Table 11.** C<sub>6</sub>H<sub>6</sub> singlet optimized with CAM-B3LYP:

|   |          |           |           |
|---|----------|-----------|-----------|
| 6 | 0.000000 | 0.000000  | 1.388255  |
| 6 | 0.000000 | 1.202218  | 0.694113  |
| 6 | 0.000000 | -1.202218 | 0.694113  |
| 1 | 0.000000 | 2.140653  | 1.235888  |
| 1 | 0.000000 | -2.140653 | 1.235888  |
| 6 | 0.000000 | 1.202218  | -0.694113 |
| 6 | 0.000000 | -1.202218 | -0.694113 |
| 1 | 0.000000 | 2.140653  | -1.235888 |
| 1 | 0.000000 | -2.140653 | -1.235888 |
| 6 | 0.000000 | 0.000000  | -1.388255 |
| 1 | 0.000000 | 0.000000  | -2.471847 |
| 1 | 0.000000 | 0.000000  | 2.471847  |

**Table 12.** C<sub>6</sub>H<sub>6</sub> singlet optimized with M06-2X:

|   |          |           |          |
|---|----------|-----------|----------|
| 6 | 0.000000 | 0.000000  | 1.390881 |
| 6 | 0.000000 | 1.204750  | 0.695536 |
| 6 | 0.000000 | -1.204750 | 0.695536 |
| 1 | 0.000000 | 2.142940  | 1.237639 |

|   |          |           |           |
|---|----------|-----------|-----------|
| 1 | 0.000000 | -2.142940 | 1.237639  |
| 6 | 0.000000 | 1.204750  | -0.695536 |
| 6 | 0.000000 | -1.204750 | -0.695536 |
| 1 | 0.000000 | 2.142940  | -1.237639 |
| 1 | 0.000000 | -2.142940 | -1.237639 |
| 6 | 0.000000 | 0.000000  | -1.390881 |
| 1 | 0.000000 | 0.000000  | -2.474377 |
| 1 | 0.000000 | 0.000000  | 2.474377  |

**Table 13.** C<sub>6</sub>H<sub>6</sub> triplet optimized with UHF:

|   |          |           |           |
|---|----------|-----------|-----------|
| 6 | 0.000000 | 1.208117  | 0.760615  |
| 6 | 0.000000 | 1.208117  | -0.760615 |
| 6 | 0.000000 | 0.000000  | 1.442394  |
| 1 | 0.000000 | 2.145858  | -1.283154 |
| 1 | 0.000000 | 0.000000  | 2.518776  |
| 6 | 0.000000 | 0.000000  | -1.442394 |
| 6 | 0.000000 | -1.208117 | 0.760615  |
| 1 | 0.000000 | 0.000000  | -2.518776 |
| 1 | 0.000000 | -2.145858 | 1.283154  |
| 6 | 0.000000 | -1.208117 | -0.760615 |
| 1 | 0.000000 | -2.145858 | -1.283154 |
| 1 | 0.000000 | 2.145858  | 1.283154  |

**Table 14.** C<sub>6</sub>H<sub>6</sub> triplet optimized with UB3LYP:

|   |          |           |           |
|---|----------|-----------|-----------|
| 6 | 0.000000 | 1.207499  | 0.760333  |
| 6 | 0.000000 | 1.207499  | -0.760333 |
| 6 | 0.000000 | 0.000000  | 1.440821  |
| 1 | 0.000000 | 2.152536  | -1.286982 |
| 1 | 0.000000 | 0.000000  | 2.526293  |
| 6 | 0.000000 | 0.000000  | -1.440821 |
| 6 | 0.000000 | -1.207499 | 0.760333  |
| 1 | 0.000000 | 0.000000  | -2.526293 |
| 1 | 0.000000 | -2.152536 | 1.286982  |
| 6 | 0.000000 | -1.207499 | -0.760333 |
| 1 | 0.000000 | -2.152536 | -1.286982 |
| 1 | 0.000000 | 2.152536  | 1.286982  |

**Table 15.** C<sub>6</sub>H<sub>6</sub> triplet optimized with UCAM-B3LYP:

|   |          |           |           |
|---|----------|-----------|-----------|
| 6 | 0.000000 | 1.202354  | 0.758354  |
| 6 | 0.000000 | 1.202354  | -0.758354 |
| 6 | 0.000000 | 0.000000  | 1.436639  |
| 1 | 0.000000 | 2.146740  | -1.284677 |
| 1 | 0.000000 | 0.000000  | 2.521141  |
| 6 | 0.000000 | 0.000000  | -1.436639 |
| 6 | 0.000000 | -1.202354 | 0.758354  |

|   |          |           |           |
|---|----------|-----------|-----------|
| 1 | 0.000000 | 0.000000  | -2.521141 |
| 1 | 0.000000 | -2.146740 | 1.284677  |
| 6 | 0.000000 | -1.202354 | -0.758354 |
| 1 | 0.000000 | -2.146740 | -1.284677 |
| 1 | 0.000000 | 2.146740  | 1.284677  |

**Table 16.** C<sub>6</sub>H<sub>6</sub> triplet optimized with UM06-2X:

|   |           |           |           |
|---|-----------|-----------|-----------|
| 6 | -0.088861 | -0.692927 | 1.257780  |
| 6 | 0.281403  | -1.388247 | 0.000000  |
| 6 | -0.088861 | 0.658915  | 1.242931  |
| 1 | 1.271629  | -1.852458 | 0.000000  |
| 1 | -0.265966 | 1.223470  | 2.152189  |
| 6 | -0.088861 | -0.692927 | -1.257780 |
| 6 | 0.040749  | 1.367153  | 0.000000  |
| 1 | -0.294958 | -1.254275 | -2.161927 |
| 1 | 0.049981  | 2.448781  | 0.000000  |
| 6 | -0.088861 | 0.658915  | -1.242931 |
| 1 | -0.265966 | 1.223470  | -2.152189 |
| 1 | -0.294958 | -1.254275 | 2.161927  |

**Table 17.** C<sub>8</sub>H<sub>8</sub> singlet optimized with HF:

|   |           |           |           |
|---|-----------|-----------|-----------|
| 6 | -1.691292 | -0.030129 | 0.380768  |
| 6 | -1.196113 | 1.196113  | 0.380770  |
| 6 | -0.030129 | 1.691292  | -0.380768 |
| 6 | 1.196113  | 1.196113  | -0.380770 |
| 6 | 1.691292  | 0.030129  | 0.380768  |
| 6 | 1.196113  | -1.196113 | 0.380770  |
| 6 | 0.030129  | -1.691292 | -0.380768 |
| 6 | -1.196113 | -1.196113 | -0.380770 |
| 1 | -2.591945 | -0.207778 | 0.948316  |
| 1 | -1.720853 | 1.949360  | 0.948320  |
| 1 | -0.207778 | 2.591945  | -0.948316 |
| 1 | 1.949360  | 1.720853  | -0.948320 |
| 1 | 2.591945  | 0.207778  | 0.948316  |
| 1 | 1.720853  | -1.949360 | 0.948320  |
| 1 | 0.207778  | -2.591945 | -0.948316 |
| 1 | -1.949360 | -1.720853 | -0.948320 |

**Table 18.** C<sub>8</sub>H<sub>8</sub> singlet optimized with B3LYP:

|   |           |           |           |
|---|-----------|-----------|-----------|
| 6 | -1.701296 | -0.038873 | 0.375227  |
| 6 | -1.203335 | 1.203335  | 0.375047  |
| 6 | -0.038873 | 1.701296  | -0.375227 |
| 6 | 1.203335  | 1.203335  | -0.375047 |
| 6 | 1.701296  | 0.038873  | 0.375227  |
| 6 | 1.203335  | -1.203335 | 0.375047  |

|   |           |           |           |
|---|-----------|-----------|-----------|
| 6 | 0.038873  | -1.701296 | -0.375227 |
| 6 | -1.203335 | -1.203335 | -0.375047 |
| 1 | -2.622600 | -0.210187 | 0.929995  |
| 1 | -1.751175 | 1.963731  | 0.929704  |
| 1 | -0.210187 | 2.622600  | -0.929995 |
| 1 | 1.963731  | 1.751175  | -0.929704 |
| 1 | 2.622600  | 0.210187  | 0.929995  |
| 1 | 1.751175  | -1.963731 | 0.929704  |
| 1 | 0.210187  | -2.622600 | -0.929995 |
| 1 | -1.963731 | -1.751175 | -0.929704 |

**Table 19.** C<sub>8</sub>H<sub>8</sub> singlet optimized with CAM-B3LYP:

|   |           |           |           |
|---|-----------|-----------|-----------|
| 6 | 1.193495  | 1.193495  | 0.385388  |
| 6 | -0.042144 | 1.687349  | 0.385324  |
| 6 | -1.193495 | 1.193495  | -0.385388 |
| 6 | -1.687349 | -0.042144 | -0.385324 |
| 6 | -1.193495 | -1.193495 | 0.385388  |
| 6 | 0.042144  | -1.687349 | 0.385324  |
| 6 | 1.193495  | -1.193495 | -0.385388 |
| 6 | 1.687349  | 0.042144  | -0.385324 |
| 1 | 1.950323  | 1.724335  | 0.958480  |
| 1 | -0.224657 | 2.593616  | 0.958391  |
| 1 | -1.724335 | 1.950323  | -0.958480 |
| 1 | -2.593616 | -0.224657 | -0.958391 |
| 1 | -1.950323 | -1.724335 | 0.958480  |
| 1 | 0.224657  | -2.593616 | 0.958391  |
| 1 | 1.724335  | -1.950323 | -0.958480 |
| 1 | 2.593616  | 0.224657  | -0.958391 |

**Table 20.** C<sub>8</sub>H<sub>8</sub> singlet optimized with M06-2X:

|   |           |           |           |
|---|-----------|-----------|-----------|
| 6 | -1.681508 | -0.049972 | 0.397541  |
| 6 | -1.189539 | 1.189539  | 0.397611  |
| 6 | -0.049972 | 1.681508  | -0.397541 |
| 6 | 1.189539  | 1.189539  | -0.397611 |
| 6 | 1.681508  | 0.049972  | 0.397541  |
| 6 | 1.189539  | -1.189539 | 0.397611  |
| 6 | 0.049972  | -1.681508 | -0.397541 |
| 6 | -1.189539 | -1.189539 | -0.397611 |
| 1 | -2.578317 | -0.242619 | 0.982279  |
| 1 | -1.710189 | 1.944597  | 0.982466  |
| 1 | -0.242619 | 2.578317  | -0.982279 |
| 1 | 1.944597  | 1.710189  | -0.982466 |
| 1 | 2.578317  | 0.242619  | 0.982279  |
| 1 | 1.710189  | -1.944597 | 0.982466  |
| 1 | 0.242619  | -2.578317 | -0.982279 |
| 1 | -1.944597 | -1.710189 | -0.982466 |

**Table 21.** C<sub>8</sub>H<sub>8</sub> triplet optimized with UHF:

|   |           |           |           |
|---|-----------|-----------|-----------|
| 6 | 0.697034  | 1.682964  | 0.000075  |
| 6 | -0.697160 | 1.682911  | 0.000074  |
| 6 | -1.682964 | 0.697034  | -0.000075 |
| 6 | -1.682911 | -0.697160 | -0.000074 |
| 6 | -0.697034 | -1.682964 | 0.000075  |
| 6 | 0.697160  | -1.682911 | 0.000074  |
| 6 | 1.682964  | -0.697034 | -0.000075 |
| 6 | 1.682911  | 0.697160  | -0.000074 |
| 1 | 1.109237  | 2.678272  | 0.000147  |
| 1 | -1.109437 | 2.678189  | 0.000146  |
| 1 | -2.678272 | 1.109237  | -0.000147 |
| 1 | -2.678189 | -1.109437 | -0.000146 |
| 1 | -1.109237 | -2.678272 | 0.000147  |
| 1 | 1.109437  | -2.678189 | 0.000146  |
| 1 | 2.678272  | -1.109237 | -0.000147 |
| 1 | 2.678189  | 1.109437  | -0.000146 |

**Table 22.** C<sub>8</sub>H<sub>8</sub> triplet optimized with UB3LYP:

|   |           |           |           |
|---|-----------|-----------|-----------|
| 6 | 0.701414  | 1.693427  | 0.000092  |
| 6 | -0.701540 | 1.693375  | 0.000091  |
| 6 | -1.693427 | 0.701414  | -0.000092 |
| 6 | -1.693375 | -0.701540 | -0.000091 |
| 6 | -0.701414 | -1.693427 | 0.000092  |
| 6 | 0.701540  | -1.693375 | 0.000091  |
| 6 | 1.693427  | -0.701414 | -0.000092 |
| 6 | 1.693375  | 0.701540  | -0.000091 |
| 1 | 1.116885  | 2.697808  | 0.001165  |
| 1 | -1.117088 | 2.697724  | 0.001164  |
| 1 | -2.697808 | 1.116885  | -0.001165 |
| 1 | -2.697724 | -1.117087 | -0.001164 |
| 1 | -1.116885 | -2.697808 | 0.001165  |
| 1 | 1.117087  | -2.697724 | 0.001164  |
| 1 | 2.697808  | -1.116885 | -0.001165 |
| 1 | 2.697724  | 1.117087  | -0.001164 |

**Table 23.** C<sub>8</sub>H<sub>8</sub> triplet optimized with UCAM-B3LYP:

|   |           |           |           |
|---|-----------|-----------|-----------|
| 6 | 0.698288  | 1.685934  | 0.000318  |
| 6 | -0.698414 | 1.685881  | 0.000317  |
| 6 | -1.685934 | 0.698288  | -0.000318 |
| 6 | -1.685881 | -0.698414 | -0.000317 |
| 6 | -0.698288 | -1.685934 | 0.000318  |
| 6 | 0.698414  | -1.685881 | 0.000317  |
| 6 | 1.685934  | -0.698288 | -0.000318 |
| 6 | 1.685881  | 0.698414  | -0.000317 |
| 1 | 1.113681  | 2.689197  | 0.000698  |
| 1 | -1.113882 | 2.689113  | 0.000698  |
| 1 | -2.689196 | 1.113681  | -0.000698 |
| 1 | -2.689113 | -1.113882 | -0.000698 |
| 1 | -1.113681 | -2.689196 | 0.000698  |

|   |          |           |           |
|---|----------|-----------|-----------|
| 1 | 1.113882 | -2.689113 | 0.000698  |
| 1 | 2.689196 | -1.113681 | -0.000698 |
| 1 | 2.689113 | 1.113882  | -0.000698 |

**Table 24.** C<sub>8</sub>H<sub>8</sub> triplet optimized with UM06-2X:

|   |           |           |           |
|---|-----------|-----------|-----------|
| 6 | 0.699878  | 1.689622  | -0.000108 |
| 6 | -0.700004 | 1.689570  | -0.000108 |
| 6 | -1.689622 | 0.699878  | 0.000108  |
| 6 | -1.689570 | -0.700004 | 0.000108  |
| 6 | -0.699878 | -1.689622 | -0.000108 |
| 6 | 0.700004  | -1.689570 | -0.000108 |
| 6 | 1.689622  | -0.699878 | 0.000108  |
| 6 | 1.689570  | 0.700004  | 0.000108  |
| 1 | 1.114901  | 2.693223  | 0.001232  |
| 1 | -1.115103 | 2.693140  | 0.001231  |
| 1 | -2.693223 | 1.114901  | -0.001232 |
| 1 | -2.693140 | -1.115103 | -0.001231 |
| 1 | -1.114901 | -2.693223 | 0.001232  |
| 1 | 1.115103  | -2.693140 | 0.001231  |
| 1 | 2.693223  | -1.114901 | -0.001232 |
| 1 | 2.693140  | 1.115103  | -0.001231 |

**Table 25.** C<sub>10</sub>H<sub>10</sub> singlet twist isomer optimized with HF:

|   |           |           |           |
|---|-----------|-----------|-----------|
| 6 | 0.337834  | -1.441633 | -0.566733 |
| 6 | -1.776604 | -1.134666 | 0.648230  |
| 6 | -2.292785 | -0.044047 | 0.091891  |
| 6 | -1.604216 | 0.959546  | -0.762792 |
| 6 | -0.456813 | 1.598564  | -0.589095 |
| 1 | 0.197828  | -1.463835 | 1.502648  |
| 1 | -2.416840 | -1.761687 | 1.247642  |
| 1 | -3.351859 | 0.127522  | 0.211691  |
| 1 | -2.147123 | 1.192630  | -1.666728 |
| 1 | -0.158120 | 2.272130  | -1.378510 |
| 6 | -0.337178 | -1.441456 | 0.566660  |
| 6 | 1.777161  | -1.134279 | -0.648100 |
| 6 | 2.292732  | -0.043327 | -0.091824 |
| 6 | 1.603687  | 0.960046  | 0.762656  |
| 6 | 0.456079  | 1.598712  | 0.588984  |
| 1 | -0.197017 | -1.464647 | -1.502786 |
| 1 | 2.418042  | -1.761130 | -1.246998 |
| 1 | 3.351901  | 0.128461  | -0.211186 |
| 1 | 2.146406  | 1.193441  | 1.666650  |
| 1 | 0.157406  | 2.272361  | 1.378319  |

**Table 26.** C<sub>10</sub>H<sub>10</sub> singlet twist isomer optimized with B3LYP:

|   |           |           |           |
|---|-----------|-----------|-----------|
| 6 | 0.339395  | -1.421621 | -0.577402 |
| 6 | -1.765131 | -1.107127 | 0.678590  |



|   |           |           |           |
|---|-----------|-----------|-----------|
| 6 | -2.300949 | -0.025433 | 0.077887  |
| 6 | -1.607582 | 0.945371  | -0.791065 |
| 6 | -0.427374 | 1.556254  | -0.605219 |
| 1 | 0.216618  | -1.462585 | 1.512493  |
| 1 | -2.399760 | -1.708252 | 1.325925  |
| 1 | -3.372421 | 0.134643  | 0.189727  |
| 1 | -2.137476 | 1.176058  | -1.714729 |
| 1 | -0.059999 | 2.173792  | -1.424196 |
| 6 | -0.339214 | -1.421480 | 0.577440  |
| 6 | 1.765252  | -1.107067 | -0.678535 |
| 6 | 2.300937  | -0.025283 | -0.077845 |
| 6 | 1.607434  | 0.945460  | 0.791029  |
| 6 | 0.427209  | 1.556309  | 0.605134  |
| 1 | -0.216376 | -1.463217 | -1.512459 |
| 1 | 2.399965  | -1.708054 | -1.325910 |
| 1 | 3.372402  | 0.135004  | -0.189649 |
| 1 | 2.137295  | 1.176346  | 1.714669  |
| 1 | 0.059900  | 2.173970  | 1.424044  |

**Table 27.** C<sub>10</sub>H<sub>10</sub> singlet twist isomer optimized with CAM-B3LYP:

|   |           |           |           |
|---|-----------|-----------|-----------|
| 6 | 0.334085  | -1.414445 | -0.575338 |
| 6 | -1.760811 | -1.103810 | 0.675632  |
| 6 | -2.289206 | -0.026898 | 0.080534  |
| 6 | -1.592213 | 0.936418  | -0.794990 |
| 6 | -0.425300 | 1.553879  | -0.606037 |
| 1 | 0.224535  | -1.442965 | 1.508026  |
| 1 | -2.395858 | -1.709894 | 1.315630  |
| 1 | -3.357100 | 0.144051  | 0.197380  |
| 1 | -2.115082 | 1.151534  | -1.724722 |
| 1 | -0.061844 | 2.179151  | -1.419018 |
| 6 | -0.333333 | -1.414266 | 0.575265  |
| 6 | 1.761455  | -1.103399 | -0.675500 |
| 6 | 2.289172  | -0.026125 | -0.080397 |
| 6 | 1.591601  | 0.936951  | 0.794845  |
| 6 | 0.424471  | 1.554041  | 0.605876  |
| 1 | -0.223661 | -1.443814 | -1.508135 |
| 1 | 2.397129  | -1.709278 | -1.315061 |
| 1 | 3.357064  | 0.145260  | -0.196839 |
| 1 | 2.114306  | 1.152540  | 1.724583  |
| 1 | 0.060996  | 2.179338  | 1.418814  |

**Table 28.** C<sub>10</sub>H<sub>10</sub> singlet twist isomer optimized with M06-2X:

|   |           |           |           |
|---|-----------|-----------|-----------|
| 6 | 0.326469  | -1.401045 | -0.581352 |
| 6 | -1.754425 | -1.082293 | 0.692727  |
| 6 | -2.284041 | -0.012962 | 0.075357  |
| 6 | -1.575816 | 0.922321  | -0.825872 |

|   |           |           |           |
|---|-----------|-----------|-----------|
| 6 | -0.399935 | 1.524891  | -0.623361 |
| 1 | 0.244839  | -1.427481 | 1.50686   |
| 1 | -2.386454 | -1.670604 | 1.352026  |
| 1 | -3.350257 | 0.167044  | 0.195031  |
| 1 | -2.078991 | 1.113240  | -1.771627 |
| 1 | 0.010308  | 2.114351  | -1.440955 |
| 6 | -0.326699 | -1.401002 | 0.581355  |
| 6 | 1.754198  | -1.082405 | -0.692751 |
| 6 | 2.284065  | -0.013224 | -0.075317 |
| 6 | 1.575994  | 0.922136  | 0.825952  |
| 6 | 0.400236  | 1.524887  | 0.623314  |
| 1 | -0.245056 | -1.427543 | -1.506862 |
| 1 | 2.386001  | -1.670618 | -1.352362 |
| 1 | 3.350378  | 0.166651  | -0.195147 |
| 1 | 2.079029  | 1.112839  | 1.771822  |
| 1 | -0.010065 | 2.114297  | 1.440913  |

**Table 29.** C<sub>10</sub>H<sub>10</sub> singlet heart isomer optimized with HF:

|   |           |           |           |
|---|-----------|-----------|-----------|
| 6 | 0.016071  | 1.700736  | -0.525203 |
| 1 | 0.082150  | -0.641985 | 1.106809  |
| 6 | -1.273484 | 1.384799  | -0.543379 |
| 6 | -2.214757 | 0.563995  | 0.273218  |
| 6 | -2.276086 | -0.760915 | 0.369324  |
| 6 | -1.184514 | -1.609493 | -0.145648 |
| 1 | -1.815002 | 1.853482  | -1.354220 |
| 1 | -3.047869 | 1.132490  | 0.659864  |
| 1 | -3.151019 | -1.209284 | 0.812666  |
| 1 | -1.382613 | -2.309017 | -0.942597 |
| 6 | 0.032247  | -1.323474 | 0.281580  |
| 6 | 1.157929  | 1.521932  | 0.422951  |
| 6 | 2.130767  | 0.618552  | 0.479994  |
| 6 | 2.280111  | -0.670448 | -0.234627 |
| 6 | 1.333864  | -1.599795 | -0.318729 |
| 1 | 1.286291  | 2.383866  | 1.062204  |
| 1 | 2.945356  | 0.846781  | 1.150906  |
| 1 | 3.250545  | -0.859852 | -0.664195 |
| 1 | 1.510523  | -2.514163 | -0.859157 |
| 1 | 0.308749  | 2.362349  | -1.329155 |

**Table 30.** C<sub>10</sub>H<sub>10</sub> singlet heart isomer optimized with B3LYP:

|   |           |           |          |
|---|-----------|-----------|----------|
| 6 | -0.138604 | 1.952192  | 0.000000 |
| 1 | 0.538690  | -0.187818 | 0.000000 |
| 6 | -0.071357 | 1.583597  | 1.373438 |
| 6 | 0.012800  | 0.533366  | 2.313746 |
| 6 | 0.012800  | -0.868800 | 2.339892 |
| 6 | 0.032025  | -1.744653 | 1.258600 |

|   |           |           |           |
|---|-----------|-----------|-----------|
| 1 | -0.122413 | 2.511436  | 1.939344  |
| 1 | 0.026859  | 0.943797  | 3.320557  |
| 1 | -0.061781 | -1.302373 | 3.333225  |
| 1 | -0.154341 | -2.803506 | 1.412903  |
| 6 | 0.224833  | -1.216418 | 0.000000  |
| 6 | -0.071357 | 1.583597  | -1.373438 |
| 6 | 0.012800  | 0.533366  | -2.313746 |
| 6 | 0.012800  | -0.868800 | -2.339892 |
| 6 | 0.032025  | -1.744653 | -1.258600 |
| 1 | -0.122413 | 2.511436  | -1.939344 |
| 1 | 0.026859  | 0.943797  | -3.320557 |
| 1 | -0.061781 | -1.302373 | -3.333225 |
| 1 | -0.154341 | -2.803506 | -1.412903 |
| 1 | -0.267931 | 3.032346  | 0.000000  |

**Table 31.** C<sub>10</sub>H<sub>10</sub> singlet heart isomer optimized with CAM-B3LYP:

|   |           |           |           |
|---|-----------|-----------|-----------|
| 6 | -0.148038 | 1.937638  | 0.000000  |
| 1 | 0.535225  | -0.171971 | 0.000000  |
| 6 | -0.074532 | 1.572847  | 1.368132  |
| 6 | 0.018054  | 0.529669  | 2.305912  |
| 6 | 0.018054  | -0.866739 | 2.331525  |
| 6 | 0.031243  | -1.733198 | 1.251292  |
| 1 | -0.128849 | 2.500193  | 1.932139  |
| 1 | 0.036254  | 0.940628  | 3.311214  |
| 1 | -0.051279 | -1.302010 | 3.323448  |
| 1 | -0.152078 | -2.792686 | 1.398133  |
| 6 | 0.219770  | -1.198711 | 0.000000  |
| 6 | -0.074532 | 1.572847  | -1.368132 |
| 6 | 0.018054  | 0.529669  | -2.305912 |
| 6 | 0.018054  | -0.866739 | -2.331525 |
| 6 | 0.031243  | -1.733198 | -1.251292 |
| 1 | -0.128849 | 2.500193  | -1.932139 |
| 1 | 0.036254  | 0.940628  | -3.311214 |
| 1 | -0.051279 | -1.302010 | -3.323448 |
| 1 | -0.152078 | -2.792686 | -1.398133 |
| 1 | -0.287540 | 3.015217  | 0.000000  |

**Table 32.** C<sub>10</sub>H<sub>10</sub> singlet heart isomer optimized with M06-2X:

|   |           |           |          |
|---|-----------|-----------|----------|
| 6 | -0.192515 | 1.928333  | 0.000000 |
| 1 | 0.602438  | -0.168018 | 0.000000 |
| 6 | -0.093619 | 1.568677  | 1.370308 |
| 6 | 0.033767  | 0.529098  | 2.311736 |
| 6 | 0.033767  | -0.869760 | 2.338087 |
| 6 | 0.033819  | -1.727623 | 1.248059 |
| 1 | -0.165315 | 2.496280  | 1.932808 |
| 1 | 0.065781  | 0.943078  | 3.315740 |

|   |           |           |           |
|---|-----------|-----------|-----------|
| 1 | -0.034360 | -1.307835 | 3.329007  |
| 1 | -0.173017 | -2.785044 | 1.379482  |
| 6 | 0.241833  | -1.183191 | 0.000000  |
| 6 | -0.093619 | 1.568677  | -1.370308 |
| 6 | 0.033767  | 0.529098  | -2.311736 |
| 6 | 0.033767  | -0.869760 | -2.338087 |
| 6 | 0.033819  | -1.727623 | -1.248059 |
| 1 | -0.165315 | 2.496280  | -1.932808 |
| 1 | 0.065781  | 0.943078  | -3.315740 |
| 1 | -0.034360 | -1.307835 | -3.329007 |
| 1 | -0.173017 | -2.785044 | -1.379482 |
| 1 | -0.377340 | 2.999513  | 0.000000  |

**Table 33.** C<sub>10</sub>H<sub>10</sub> triplet naphthalene isomer optimized with UHF:

|   |           |           |           |
|---|-----------|-----------|-----------|
| 6 | 2.275974  | -0.723700 | -0.186449 |
| 6 | 2.276018  | 0.723660  | 0.186345  |
| 6 | 1.258540  | 1.605194  | -0.010421 |
| 6 | -0.000206 | 1.251749  | -0.610209 |
| 6 | -1.258425 | 1.605130  | -0.009689 |
| 6 | -2.276049 | 0.723497  | 0.187142  |
| 6 | -2.276027 | -0.723522 | -0.187237 |
| 6 | -1.258423 | -1.605138 | 0.009742  |
| 6 | -0.000222 | -1.251645 | 0.610239  |
| 6 | 1.258533  | -1.605225 | 0.010553  |
| 1 | 3.162218  | -1.078371 | -0.686991 |
| 1 | 3.162385  | 1.078338  | 0.686664  |
| 1 | 1.359227  | 2.588742  | 0.422357  |
| 1 | -0.000379 | 0.408085  | -1.270598 |
| 1 | -1.358533 | 2.588268  | 0.424173  |
| 1 | -3.161767 | 1.077547  | 0.689033  |
| 1 | -3.161726 | -1.077608 | -0.689136 |
| 1 | -1.358512 | -2.588335 | -0.423991 |
| 1 | -0.000406 | -0.407793 | 1.270401  |
| 1 | 1.359219  | -2.588864 | -0.422021 |

**Table 34.** C<sub>10</sub>H<sub>10</sub> triplet naphthalene isomer optimized with UB3LYP:

|   |           |           |           |
|---|-----------|-----------|-----------|
| 6 | 2.329884  | -0.718439 | -0.137951 |
| 6 | 2.329897  | 0.718399  | 0.137955  |
| 6 | 1.268856  | 1.569237  | -0.004729 |
| 6 | -0.000140 | 1.169619  | -0.535539 |
| 6 | -1.268589 | 1.568975  | -0.003683 |
| 6 | -2.330060 | 0.718384  | 0.138496  |
| 6 | -2.330070 | -0.718361 | -0.138516 |
| 6 | -1.268625 | -1.568969 | 0.003707  |
| 6 | -0.000155 | -1.169596 | 0.535525  |
| 6 | 1.268818  | -1.569254 | 0.004735  |

|   |           |           |           |
|---|-----------|-----------|-----------|
| 1 | 3.267522  | -1.136104 | -0.495965 |
| 1 | 3.267551  | 1.136056  | 0.495936  |
| 1 | 1.370876  | 2.581606  | 0.383394  |
| 1 | -0.000376 | 0.369691  | -1.264105 |
| 1 | -1.369842 | 2.580929  | 0.385749  |
| 1 | -3.267568 | 1.135957  | 0.496903  |
| 1 | -3.267588 | -1.135927 | -0.496906 |
| 1 | -1.369906 | -2.580949 | -0.385650 |
| 1 | -0.000378 | -0.369613 | 1.264032  |
| 1 | 1.370809  | -2.581622 | -0.383399 |

**Table 35.** C<sub>10</sub>H<sub>10</sub> triplet naphthalene isomer optimized with UCAM-B3LYP:

|   |           |           |           |
|---|-----------|-----------|-----------|
| 6 | 2.311449  | -0.717932 | -0.147100 |
| 6 | 2.311459  | 0.717917  | 0.147077  |
| 6 | 1.262221  | 1.565453  | -0.006479 |
| 6 | -0.000121 | 1.171199  | -0.550721 |
| 6 | -1.262117 | 1.565246  | -0.006051 |
| 6 | -2.311535 | 0.717895  | 0.147533  |
| 6 | -2.311532 | -0.717900 | -0.147558 |
| 6 | -1.262122 | -1.565248 | 0.006067  |
| 6 | -0.000124 | -1.171169 | 0.550720  |
| 6 | 1.262215  | -1.565464 | 0.006515  |
| 1 | 3.241715  | -1.126326 | -0.530982 |
| 1 | 3.241750  | 1.126311  | 0.530897  |
| 1 | 1.360824  | 2.576478  | 0.383267  |
| 1 | -0.000003 | 0.360433  | -1.265862 |
| 1 | -1.360439 | 2.576037  | 0.384415  |
| 1 | -3.241485 | 1.126208  | 0.532205  |
| 1 | -3.241483 | -1.126221 | -0.532220 |
| 1 | -1.360444 | -2.576058 | -0.384352 |
| 1 | -0.000008 | -0.360335 | 1.265788  |
| 1 | 1.360815  | -2.576511 | -0.383175 |

**Table 36.** C<sub>10</sub>H<sub>10</sub> triplet naphthalene isomer optimized with UM06-2X:

|   |           |           |           |
|---|-----------|-----------|-----------|
| 6 | 2.312791  | -0.717429 | -0.151362 |
| 6 | 2.312778  | 0.717415  | 0.151462  |
| 6 | 1.259832  | 1.562535  | -0.006378 |
| 6 | -0.000052 | 1.163093  | -0.562636 |
| 6 | -1.259718 | 1.562377  | -0.006178 |
| 6 | -2.312865 | 0.717429  | 0.151633  |
| 6 | -2.312899 | -0.717375 | -0.151556 |
| 6 | -1.259762 | -1.562360 | 0.006146  |
| 6 | -0.000068 | -1.163153 | 0.562593  |
| 6 | 1.259790  | -1.562533 | 0.006276  |
| 1 | 3.241142  | -1.127274 | -0.538228 |
| 1 | 3.241078  | 1.127252  | 0.538458  |

|   |           |           |           |
|---|-----------|-----------|-----------|
| 1 | 1.348527  | 2.574367  | 0.384155  |
| 1 | 0.000032  | 0.355086  | -1.283134 |
| 1 | -1.348084 | 2.573996  | 0.385015  |
| 1 | -3.240960 | 1.127328  | 0.539004  |
| 1 | -3.241020 | -1.127229 | -0.538914 |
| 1 | -1.348169 | -2.573945 | -0.385122 |
| 1 | 0.000038  | -0.355274 | 1.283228  |
| 1 | 1.348455  | -2.574289 | -0.384458 |

**Table 37.** C<sub>10</sub>H<sub>10</sub> triplet twist optimized with UHF:

|   |           |           |           |
|---|-----------|-----------|-----------|
| 6 | 0.409205  | -1.563695 | -0.621913 |
| 6 | -1.622343 | -0.959496 | 0.834352  |
| 6 | -2.264536 | -0.000056 | 0.000312  |
| 6 | -1.622379 | 0.959284  | -0.834260 |
| 6 | -0.409398 | 1.563978  | -0.621770 |
| 1 | -0.078400 | -2.268275 | 1.369657  |
| 1 | -2.186852 | -1.307669 | 1.685526  |
| 1 | -3.343096 | 0.000330  | 0.000714  |
| 1 | -2.186962 | 1.307037  | -1.685552 |
| 1 | -0.078892 | 2.268341  | -1.369889 |
| 6 | -0.409115 | -1.563908 | 0.621657  |
| 6 | 1.622251  | -0.959207 | -0.834565 |
| 6 | 2.264567  | -0.000285 | 0.000206  |
| 6 | 1.622364  | 0.959229  | 0.834413  |
| 6 | 0.409476  | 1.564061  | 0.621583  |
| 1 | 0.078179  | -2.267561 | -1.370258 |
| 1 | 2.186536  | -1.306711 | -1.686163 |
| 1 | 3.343084  | -0.000743 | 0.000727  |
| 1 | 2.186853  | 1.307126  | 1.685703  |
| 1 | 0.078991  | 2.268696  | 1.369453  |

**Table 38.** C<sub>10</sub>H<sub>10</sub> triplet twist optimized with UB3LYP:

|   |           |           |           |
|---|-----------|-----------|-----------|
| 6 | 0.398174  | -1.479928 | -0.623724 |
| 6 | -1.633946 | -0.935233 | 0.836243  |
| 6 | -2.296540 | 0.000017  | -0.000043 |
| 6 | -1.633919 | 0.935280  | -0.836231 |
| 6 | -0.398145 | 1.479980  | -0.623668 |
| 1 | -0.003275 | -2.126932 | 1.406729  |
| 1 | -2.180435 | -1.290684 | 1.708104  |
| 1 | -3.383575 | -0.000034 | -0.000124 |
| 1 | -2.180357 | 1.290786  | -1.708100 |
| 1 | -0.003218 | 2.126914  | -1.406696 |
| 6 | -0.398203 | -1.479971 | 0.623729  |
| 6 | 1.633909  | -0.935200 | -0.836319 |
| 6 | 2.296583  | -0.000001 | -0.000015 |
| 6 | 1.633931  | 0.935163  | 0.836308  |

|   |          |           |           |
|---|----------|-----------|-----------|
| 6 | 0.398198 | 1.479904  | 0.623737  |
| 1 | 0.003164 | -2.126809 | -1.406757 |
| 1 | 2.180285 | -1.290581 | -1.708277 |
| 1 | 3.383614 | -0.000021 | -0.000065 |
| 1 | 2.180315 | 1.290541  | 1.708264  |
| 1 | 0.003234 | 2.126751  | 1.406822  |

**Table 39.** C<sub>10</sub>H<sub>10</sub> triplet twist optimized with UCAM-B3LYP:

|   |           |           |           |
|---|-----------|-----------|-----------|
| 6 | 0.393930  | -1.470200 | -0.625623 |
| 6 | -1.619772 | -0.924146 | 0.842776  |
| 6 | -2.283161 | 0.001244  | 0.000161  |
| 6 | -1.617982 | 0.924336  | -0.844818 |
| 6 | -0.392442 | 1.469348  | -0.626440 |
| 1 | 0.003485  | -2.120406 | 1.402654  |
| 1 | -2.160842 | -1.268780 | 1.720743  |
| 1 | -3.368952 | 0.003452  | 0.001665  |
| 1 | -2.157386 | 1.266692  | -1.724698 |
| 1 | 0.008384  | 2.116247  | -1.404521 |
| 6 | -0.393955 | -1.470399 | 0.625400  |
| 6 | 1.619645  | -0.923957 | -0.842958 |
| 6 | 2.283227  | 0.001014  | 0.000264  |
| 6 | 1.618074  | 0.924263  | 0.844892  |
| 6 | 0.392508  | 1.469342  | 0.626348  |
| 1 | -0.003716 | -2.119821 | -1.403108 |
| 1 | 2.160500  | -1.268033 | -1.721271 |
| 1 | 3.369010  | 0.002457  | -0.000576 |
| 1 | 2.157405  | 1.266786  | 1.724751  |
| 1 | -0.008320 | 2.116334  | 1.404352  |

**Table 40.** C<sub>10</sub>H<sub>10</sub> triplet twist optimized with UM06-2X:

|   |           |           |           |
|---|-----------|-----------|-----------|
| 6 | 0.381512  | -1.427092 | -0.634273 |
| 6 | -1.617333 | -0.898056 | 0.858507  |
| 6 | -2.290296 | 0.008094  | -0.000489 |
| 6 | -1.606783 | 0.900399  | -0.871478 |
| 6 | -0.371215 | 1.419817  | -0.640271 |
| 1 | 0.049278  | -2.046306 | 1.419020  |
| 1 | -2.144805 | -1.231680 | 1.748575  |
| 1 | -3.375248 | 0.018948  | 0.006232  |
| 1 | -2.123674 | 1.221193  | -1.772408 |
| 1 | 0.083025  | 2.016777  | -1.428951 |
| 6 | -0.381426 | -1.426972 | 0.634254  |
| 6 | 1.617272  | -0.898125 | -0.858396 |
| 6 | 2.290202  | 0.007940  | 0.001011  |
| 6 | 1.606891  | 0.900799  | 0.871147  |
| 6 | 0.371066  | 1.420076  | 0.639936  |
| 1 | -0.049076 | -2.046591 | -1.418968 |

|   |           |           |           |
|---|-----------|-----------|-----------|
| 1 | 2.144894  | -1.231509 | -1.748469 |
| 1 | 3.375178  | 0.017898  | -0.004718 |
| 1 | 2.124042  | 1.222534  | 1.771598  |
| 1 | -0.082949 | 2.017456  | 1.428405  |

**Table 41.** C<sub>12</sub>H<sub>12</sub> singlet optimized with HF:

|   |           |           |           |
|---|-----------|-----------|-----------|
| 6 | 0.417282  | -1.651986 | 0.290132  |
| 6 | -0.620935 | -2.215960 | -0.310621 |
| 6 | -2.039543 | -1.872466 | -0.054999 |
| 6 | -2.541807 | -0.678744 | 0.245999  |
| 6 | -1.740749 | 0.559233  | 0.463608  |
| 6 | -1.636163 | 1.593221  | -0.354575 |
| 6 | 1.843420  | -1.813486 | -0.050812 |
| 6 | 2.713599  | -0.804293 | -0.024175 |
| 6 | 2.355261  | 0.608389  | 0.235363  |
| 6 | 1.248967  | 1.139658  | -0.270856 |
| 6 | 0.660322  | 2.466142  | -0.028419 |
| 6 | -0.650369 | 2.680962  | -0.117879 |
| 1 | 0.232472  | -0.943006 | 1.072207  |
| 1 | -0.455197 | -2.946328 | -1.088542 |
| 1 | -2.742158 | -2.679260 | -0.193034 |
| 1 | -3.610521 | -0.599126 | 0.367674  |
| 1 | -1.160728 | 0.593800  | 1.370648  |
| 1 | -2.234198 | 1.644813  | -1.252440 |
| 1 | 2.189653  | -2.794099 | -0.333660 |
| 1 | 3.752289  | -1.016104 | -0.221881 |
| 1 | 3.016540  | 1.186201  | 0.863218  |
| 1 | 0.666155  | 0.517312  | -0.920161 |
| 1 | 1.317768  | 3.286386  | 0.209541  |
| 1 | -1.027774 | 3.685394  | -0.010164 |

**Table 42.** C<sub>12</sub>H<sub>12</sub> singlet optimized with B3LYP:

|   |           |           |           |
|---|-----------|-----------|-----------|
| 6 | 0.477204  | -1.624864 | 0.243329  |
| 6 | -0.575204 | -2.317071 | -0.237086 |
| 6 | -1.984721 | -1.958363 | -0.038751 |
| 6 | -2.512059 | -0.742446 | 0.221163  |
| 6 | -1.736490 | 0.500140  | 0.438178  |
| 6 | -1.719340 | 1.602934  | -0.327072 |
| 6 | 1.888617  | -1.765570 | -0.070614 |
| 6 | 2.752689  | -0.718804 | -0.027969 |
| 6 | 2.373766  | 0.678112  | 0.197305  |
| 6 | 1.195473  | 1.178246  | -0.233792 |
| 6 | 0.591776  | 2.481787  | -0.010235 |
| 6 | -0.741791 | 2.687560  | -0.116908 |
| 1 | 0.269346  | -0.797312 | 0.904016  |
| 1 | -0.397450 | -3.174453 | -0.884340 |



|   |           |           |           |
|---|-----------|-----------|-----------|
| 1 | -2.694147 | -2.765717 | -0.206127 |
| 1 | -3.596244 | -0.666213 | 0.269462  |
| 1 | -1.075926 | 0.509901  | 1.301408  |
| 1 | -2.411797 | 1.699494  | -1.162487 |
| 1 | 2.264736  | -2.743775 | -0.359657 |
| 1 | 3.809680  | -0.920627 | -0.183889 |
| 1 | 3.078141  | 1.310360  | 0.735515  |
| 1 | 0.578924  | 0.512209  | -0.822705 |
| 1 | 1.238303  | 3.322559  | 0.229519  |
| 1 | -1.123079 | 3.703617  | -0.046005 |

**Table 43.** C<sub>12</sub>H<sub>12</sub> singlet optimized with CAM-B3LYP:

|   |           |           |           |
|---|-----------|-----------|-----------|
| 6 | 0.486358  | -1.615805 | 0.258750  |
| 6 | -0.544879 | -2.279747 | -0.273517 |
| 6 | -1.961186 | -1.961990 | -0.042530 |
| 6 | -2.496411 | -0.766725 | 0.241652  |
| 6 | -1.732575 | 0.484588  | 0.446860  |
| 6 | -1.717820 | 1.561126  | -0.339643 |
| 6 | 1.903059  | -1.738906 | -0.066010 |
| 6 | 2.748857  | -0.693280 | -0.026414 |
| 6 | 2.345671  | 0.696431  | 0.214583  |
| 6 | 1.179478  | 1.175837  | -0.237790 |
| 6 | 0.561849  | 2.477352  | -0.017841 |
| 6 | -0.763300 | 2.664938  | -0.126396 |
| 1 | 0.273001  | -0.837145 | 0.975692  |
| 1 | -0.351896 | -3.083018 | -0.981441 |
| 1 | -2.654507 | -2.785319 | -0.191864 |
| 1 | -3.577669 | -0.707064 | 0.334441  |
| 1 | -1.090846 | 0.521283  | 1.322365  |
| 1 | -2.389108 | 1.625503  | -1.193693 |
| 1 | 2.284002  | -2.714068 | -0.354970 |
| 1 | 3.805212  | -0.876702 | -0.200808 |
| 1 | 3.024540  | 1.330956  | 0.779922  |
| 1 | 0.582972  | 0.506677  | -0.842688 |
| 1 | 1.202007  | 3.323231  | 0.215916  |
| 1 | -1.162312 | 3.672758  | -0.053096 |

**Table 44.** C<sub>12</sub>H<sub>12</sub> singlet optimized with M06-2X:

|   |           |           |           |
|---|-----------|-----------|-----------|
| 6 | 0.502129  | -1.610776 | 0.257796  |
| 6 | -0.522724 | -2.269379 | -0.299752 |
| 6 | -1.941849 | -1.982195 | -0.034695 |
| 6 | -2.481398 | -0.792166 | 0.272773  |
| 6 | -1.721380 | 0.469659  | 0.451703  |
| 6 | -1.730811 | 1.532053  | -0.359045 |
| 6 | 1.919955  | -1.716225 | -0.083970 |
| 6 | 2.758991  | -0.662990 | -0.021884 |

|   |           |           |           |
|---|-----------|-----------|-----------|
| 6 | 2.330827  | 0.717750  | 0.241801  |
| 6 | 1.160626  | 1.179699  | -0.227544 |
| 6 | 0.531278  | 2.480275  | -0.016174 |
| 6 | -0.796014 | 2.656624  | -0.152039 |
| 1 | 0.286539  | -0.864694 | 1.011181  |
| 1 | -0.320991 | -3.041181 | -1.039829 |
| 1 | -2.627328 | -2.815114 | -0.166894 |
| 1 | -3.559071 | -0.743301 | 0.407967  |
| 1 | -1.077945 | 0.537975  | 1.326003  |
| 1 | -2.406939 | 1.568050  | -1.210864 |
| 1 | 2.303348  | -2.682019 | -0.400665 |
| 1 | 3.816979  | -0.829684 | -0.203434 |
| 1 | 2.989532  | 1.360046  | 0.822114  |
| 1 | 0.583767  | 0.505503  | -0.849486 |
| 1 | 1.163165  | 3.330514  | 0.225296  |
| 1 | -1.208843 | 3.659932  | -0.095208 |

**Table 45.** C<sub>12</sub>H<sub>12</sub> triplet optimized with UHF:

|   |           |           |           |
|---|-----------|-----------|-----------|
| 6 | 0.567862  | -1.677868 | 0.272985  |
| 6 | -0.540107 | -2.428556 | -0.220260 |
| 6 | -1.910565 | -2.066174 | -0.048653 |
| 6 | -2.454856 | -0.841511 | 0.283552  |
| 6 | -1.693103 | 0.425872  | 0.477151  |
| 6 | -1.766168 | 1.519481  | -0.318535 |
| 6 | 1.827593  | -1.611225 | -0.254774 |
| 6 | 2.782429  | -0.542792 | 0.174793  |
| 6 | 2.453634  | 0.791904  | 0.172262  |
| 6 | 1.177424  | 1.253595  | -0.255495 |
| 6 | 0.544475  | 2.490253  | -0.037798 |
| 6 | -0.837422 | 2.642640  | -0.219189 |
| 1 | 0.366196  | -1.011827 | 1.088070  |
| 1 | -0.341357 | -3.301018 | -0.821661 |
| 1 | -2.623499 | -2.842436 | -0.277835 |
| 1 | -3.528362 | -0.788684 | 0.364352  |
| 1 | -1.004001 | 0.464735  | 1.300337  |
| 1 | -2.543415 | 1.578671  | -1.066352 |
| 1 | 2.107026  | -2.237807 | -1.087451 |
| 1 | 3.753301  | -0.842612 | 0.532217  |
| 1 | 3.168642  | 1.496699  | 0.565967  |
| 1 | 0.568387  | 0.522233  | -0.737795 |
| 1 | 1.125301  | 3.354093  | 0.245599  |
| 1 | -1.240838 | 3.638383  | -0.307205 |

**Table 46.** C<sub>12</sub>H<sub>12</sub> triplet optimized with UB3LYP:

|   |           |           |           |
|---|-----------|-----------|-----------|
| 6 | 0.590801  | -1.655800 | 0.326714  |
| 6 | -0.500698 | -2.480600 | 0.010508  |
| 6 | -1.852699 | -2.076561 | -0.035292 |
| 6 | -2.408491 | -0.778441 | -0.019153 |

|   |           |           |           |
|---|-----------|-----------|-----------|
| 6 | -1.719018 | 0.404388  | 0.291422  |
| 6 | -1.929403 | 1.718053  | -0.125750 |
| 6 | 1.926696  | -1.721349 | -0.067136 |
| 6 | 2.778790  | -0.592475 | -0.005739 |
| 6 | 2.376829  | 0.755271  | 0.087118  |
| 6 | 1.081814  | 1.210945  | -0.197584 |
| 6 | 0.476863  | 2.450033  | 0.058139  |
| 6 | -0.905868 | 2.694192  | -0.061333 |
| 1 | 0.372680  | -0.782754 | 0.911788  |
| 1 | -0.294655 | -3.480153 | -0.368324 |
| 1 | -2.548470 | -2.861188 | -0.319696 |
| 1 | -3.417866 | -0.693579 | -0.417966 |
| 1 | -0.837259 | 0.296037  | 0.893789  |
| 1 | -2.891552 | 2.012369  | -0.540768 |
| 1 | 2.335549  | -2.649947 | -0.461019 |
| 1 | 3.848851  | -0.780107 | -0.045927 |
| 1 | 3.132043  | 1.481347  | 0.383162  |
| 1 | 0.449696  | 0.493636  | -0.702619 |
| 1 | 1.107351  | 3.287569  | 0.351697  |
| 1 | -1.213405 | 3.735165  | -0.121750 |

**Table 47.** C<sub>12</sub>H<sub>12</sub> triplet optimized with UCAM-B3LYP:

|   |           |           |           |
|---|-----------|-----------|-----------|
| 6 | 0.593118  | -1.636457 | 0.345491  |
| 6 | -0.521351 | -2.486301 | 0.037263  |
| 6 | -1.855186 | -2.078842 | -0.038503 |
| 6 | -2.412739 | -0.799252 | 0.008433  |
| 6 | -1.700382 | 0.409472  | 0.310327  |
| 6 | -1.866773 | 1.647920  | -0.209744 |
| 6 | 1.851426  | -1.668725 | -0.152280 |
| 6 | 2.769193  | -0.556150 | 0.022252  |
| 6 | 2.389909  | 0.766714  | 0.081619  |
| 6 | 1.090294  | 1.220023  | -0.215655 |
| 6 | 0.487246  | 2.463827  | 0.052373  |
| 6 | -0.868975 | 2.689097  | -0.034052 |
| 1 | 0.398157  | -0.815375 | 1.013083  |
| 1 | -0.307300 | -3.501171 | -0.285721 |
| 1 | -2.550841 | -2.863542 | -0.321259 |
| 1 | -3.439850 | -0.707196 | -0.333157 |
| 1 | -0.874585 | 0.319769  | 0.994337  |
| 1 | -2.739632 | 1.875069  | -0.818485 |
| 1 | 2.186901  | -2.519253 | -0.742272 |
| 1 | 3.827361  | -0.786894 | 0.098690  |
| 1 | 3.143419  | 1.497452  | 0.366712  |
| 1 | 0.456323  | 0.500722  | -0.711099 |
| 1 | 1.122559  | 3.299973  | 0.335718  |
| 1 | -1.219711 | 3.715170  | 0.020209  |

**Table 48.** C<sub>12</sub>H<sub>12</sub> triplet optimized with UM06-2X:

|   |          |           |          |
|---|----------|-----------|----------|
| 6 | 0.592402 | -1.631060 | 0.341089 |
|---|----------|-----------|----------|

|   |           |           |           |
|---|-----------|-----------|-----------|
| 6 | -0.511478 | -2.476927 | 0.030284  |
| 6 | -1.853016 | -2.076847 | -0.029140 |
| 6 | -2.404329 | -0.789564 | 0.002693  |
| 6 | -1.695307 | 0.408937  | 0.307196  |
| 6 | -1.886667 | 1.667538  | -0.191964 |
| 6 | 1.873848  | -1.685237 | -0.133455 |
| 6 | 2.772578  | -0.569031 | 0.008221  |
| 6 | 2.376766  | 0.757419  | 0.096046  |
| 6 | 1.075116  | 1.203700  | -0.199631 |
| 6 | 0.478330  | 2.449497  | 0.067101  |
| 6 | -0.883138 | 2.690097  | -0.049070 |
| 1 | 0.401259  | -0.797235 | 0.993015  |
| 1 | -0.292740 | -3.481521 | -0.322457 |
| 1 | -2.547767 | -2.860651 | -0.315819 |
| 1 | -3.421813 | -0.692499 | -0.367193 |
| 1 | -0.857461 | 0.325547  | 0.976575  |
| 1 | -2.794042 | 1.906835  | -0.742628 |
| 1 | 2.225210  | -2.567973 | -0.663644 |
| 1 | 3.837156  | -0.781308 | 0.033111  |
| 1 | 3.122847  | 1.492961  | 0.388870  |
| 1 | 0.447891  | 0.490626  | -0.717508 |
| 1 | 1.118492  | 3.278983  | 0.359613  |
| 1 | -1.215556 | 3.723762  | -0.047024 |

**Table 49.** C<sub>14</sub>H<sub>14</sub> singlet optimized with HF:

|   |           |           |           |
|---|-----------|-----------|-----------|
| 6 | 1.476458  | -1.517354 | -0.304661 |
| 1 | 0.982567  | -0.726990 | -0.833557 |
| 6 | 2.897266  | -1.269783 | -0.068531 |
| 1 | 3.541242  | -2.118723 | 0.093716  |
| 6 | 3.433388  | -0.045858 | -0.022837 |
| 1 | 4.501269  | 0.031363  | 0.104293  |
| 6 | 2.707729  | 1.232195  | -0.155033 |
| 1 | 3.212306  | 2.009335  | -0.710000 |
| 6 | 1.491774  | 1.464145  | 0.335165  |
| 1 | 1.041340  | 0.695551  | 0.932500  |
| 6 | 0.668130  | 2.644236  | 0.054926  |
| 1 | 1.181695  | 3.538464  | -0.257785 |
| 6 | -0.668128 | 2.644236  | 0.054925  |
| 1 | -1.181692 | 3.538463  | -0.257788 |
| 6 | -1.491773 | 1.464145  | 0.335164  |
| 1 | -1.041338 | 0.695551  | 0.932500  |
| 6 | -2.707728 | 1.232197  | -0.155032 |
| 1 | -3.212305 | 2.009337  | -0.709998 |
| 6 | -3.433388 | -0.045856 | -0.022836 |
| 1 | -4.501268 | 0.031367  | 0.104294  |
| 6 | -2.897267 | -1.269782 | -0.068530 |
| 1 | -3.541244 | -2.118721 | 0.093718  |
| 6 | -1.476460 | -1.517354 | -0.304665 |
| 1 | -0.982570 | -0.726994 | -0.833565 |
| 6 | -0.739046 | -2.524343 | 0.156567  |

|   |           |           |          |
|---|-----------|-----------|----------|
| 1 | -1.212200 | -3.328441 | 0.697275 |
| 6 | 0.739043  | -2.524344 | 0.156566 |
| 1 | 1.212197  | -3.328445 | 0.697271 |

**Table 50.** C<sub>14</sub>H<sub>14</sub> singlet optimized with B3LYP:

|   |           |           |           |
|---|-----------|-----------|-----------|
| 6 | -1.480216 | -1.494121 | 0.269124  |
| 1 | -0.961547 | -0.662218 | 0.723648  |
| 6 | -2.826016 | -1.263473 | -0.014872 |
| 1 | -3.453119 | -2.115856 | -0.270144 |
| 6 | -3.443566 | -0.000024 | -0.000005 |
| 1 | -4.530778 | 0.000014  | -0.000076 |
| 6 | -2.825928 | 1.263463  | 0.014963  |
| 1 | -3.452988 | 2.115823  | 0.270421  |
| 6 | -1.480213 | 1.494090  | -0.269117 |
| 1 | -0.961539 | 0.662192  | -0.723639 |
| 6 | -0.704582 | 2.611083  | 0.039481  |
| 1 | -1.200882 | 3.484475  | 0.455517  |
| 6 | 0.704581  | 2.611087  | 0.039483  |
| 1 | 1.200877  | 3.484477  | 0.455531  |
| 6 | 1.480217  | 1.494102  | -0.269129 |
| 1 | 0.961548  | 0.662218  | -0.723677 |
| 6 | 2.825928  | 1.263466  | 0.014965  |
| 1 | 3.452987  | 2.115821  | 0.270440  |
| 6 | 3.443563  | -0.000025 | -0.000004 |
| 1 | 4.530774  | 0.000012  | -0.000073 |
| 6 | 2.826016  | -1.263477 | -0.014874 |
| 1 | 3.453118  | -2.115857 | -0.270158 |
| 6 | 1.480219  | -1.494133 | 0.269131  |
| 1 | 0.961553  | -0.662242 | 0.723676  |
| 6 | 0.704619  | -2.611030 | -0.039573 |
| 1 | 1.200883  | -3.484379 | -0.455743 |
| 6 | -0.704621 | -2.611025 | -0.039570 |
| 1 | -1.200892 | -3.484375 | -0.455731 |

**Table 51.** C<sub>14</sub>H<sub>14</sub> singlet optimized with CAM-B3LYP:

|   |          |           |           |
|---|----------|-----------|-----------|
| 6 | 1.480778 | 1.454366  | 0.304969  |
| 1 | 0.993413 | 0.644674  | 0.829048  |
| 6 | 2.751598 | 1.242254  | -0.098583 |
| 1 | 3.307129 | 2.070340  | -0.534858 |
| 6 | 3.441880 | -0.029663 | -0.017451 |
| 1 | 4.524287 | 0.019169  | 0.058846  |
| 6 | 2.873753 | -1.261594 | -0.050174 |
| 1 | 3.513861 | -2.124107 | 0.114708  |
| 6 | 1.475703 | -1.493735 | -0.285068 |
| 1 | 0.968110 | -0.673297 | -0.774895 |
| 6 | 0.726502 | -2.540235 | 0.118956  |

|   |           |           |           |
|---|-----------|-----------|-----------|
| 1 | 1.211461  | -3.374328 | 0.618723  |
| 6 | -0.726502 | -2.540235 | 0.118956  |
| 1 | -1.211462 | -3.374328 | 0.618723  |
| 6 | -1.475703 | -1.493735 | -0.285069 |
| 1 | -0.968110 | -0.673297 | -0.774896 |
| 6 | -2.873753 | -1.261594 | -0.050174 |
| 1 | -3.513862 | -2.124106 | 0.114708  |
| 6 | -3.441880 | -0.029663 | -0.017451 |
| 1 | -4.524287 | 0.019170  | 0.058846  |
| 6 | -2.751597 | 1.242254  | -0.098583 |
| 1 | -3.307129 | 2.070341  | -0.534858 |
| 6 | -1.480777 | 1.454366  | 0.304968  |
| 1 | -0.993412 | 0.644674  | 0.829047  |
| 6 | -0.678292 | 2.616864  | 0.028512  |
| 1 | -1.193240 | 3.508010  | -0.318530 |
| 6 | 0.678293  | 2.616864  | 0.028512  |
| 1 | 1.193241  | 3.508010  | -0.318530 |

**Table 52.** C<sub>14</sub>H<sub>14</sub> singlet optimized with M06-2X:

|   |           |           |           |
|---|-----------|-----------|-----------|
| 6 | 1.481684  | 1.439705  | 0.312966  |
| 1 | 1.001635  | 0.627520  | 0.844335  |
| 6 | 2.756785  | 1.240259  | -0.097887 |
| 1 | 3.301459  | 2.075209  | -0.535332 |
| 6 | 3.454040  | -0.028800 | -0.013722 |
| 1 | 4.536053  | 0.018238  | 0.069287  |
| 6 | 2.876135  | -1.259973 | -0.047488 |
| 1 | 3.504124  | -2.129011 | 0.131733  |
| 6 | 1.477043  | -1.479721 | -0.299883 |
| 1 | 0.978004  | -0.663605 | -0.809493 |
| 6 | 0.726813  | -2.524618 | 0.119145  |
| 1 | 1.215521  | -3.347344 | 0.634496  |
| 6 | -0.726814 | -2.524618 | 0.119147  |
| 1 | -1.215520 | -3.347342 | 0.634504  |
| 6 | -1.477045 | -1.479724 | -0.299885 |
| 1 | -0.978007 | -0.663613 | -0.809503 |
| 6 | -2.876136 | -1.259973 | -0.047487 |
| 1 | -3.504126 | -2.129010 | 0.131738  |
| 6 | -3.454039 | -0.028799 | -0.013722 |
| 1 | -4.536051 | 0.018240  | 0.069288  |
| 6 | -2.756784 | 1.240260  | -0.097888 |
| 1 | -3.301456 | 2.075209  | -0.535339 |
| 6 | -1.481685 | 1.439709  | 0.312968  |
| 1 | -1.001638 | 0.627528  | 0.844345  |
| 6 | -0.680111 | 2.601841  | 0.026561  |
| 1 | -1.197834 | 3.486826  | -0.333185 |
| 6 | 0.680113  | 2.601840  | 0.026561  |
| 1 | 1.197837  | 3.486824  | -0.333184 |

**Table 53.** TS C<sub>14</sub>H<sub>14</sub> optimized with CAM-B3LYP:

|   |           |           |           |
|---|-----------|-----------|-----------|
| 6 | 1.472548  | -1.474810 | -0.273507 |
| 1 | 0.959377  | -0.643927 | -0.733822 |
| 6 | 2.813745  | -1.254805 | 0.013708  |
| 1 | 3.433100  | -2.111722 | 0.268609  |
| 6 | 3.433616  | -0.000002 | 0.000002  |
| 1 | 4.519786  | 0.000002  | 0.000014  |
| 6 | 2.813735  | 1.254803  | -0.013720 |
| 1 | 3.433084  | 2.111718  | -0.268648 |
| 6 | 1.472547  | 1.474806  | 0.273505  |
| 1 | 0.959376  | 0.643923  | 0.733818  |
| 6 | 0.700957  | 2.586310  | -0.040191 |
| 1 | 1.199119  | 3.454449  | -0.462706 |
| 6 | -0.700957 | 2.586309  | -0.040191 |
| 1 | -1.199121 | 3.454448  | -0.462706 |
| 6 | -1.472547 | 1.474805  | 0.273506  |
| 1 | -0.959376 | 0.643922  | 0.733819  |
| 6 | -2.813735 | 1.254803  | -0.013720 |
| 1 | -3.433084 | 2.111717  | -0.268648 |
| 6 | -3.433616 | -0.000002 | 0.000002  |
| 1 | -4.519786 | 0.000001  | 0.000013  |
| 6 | -2.813744 | -1.254805 | 0.013708  |
| 1 | -3.433100 | -2.111722 | 0.268608  |
| 6 | -1.472547 | -1.474809 | -0.273507 |
| 1 | -0.959376 | -0.643926 | -0.733821 |
| 6 | -0.700960 | -2.586303 | 0.040203  |
| 1 | -1.199121 | -3.454435 | 0.462736  |
| 6 | 0.700960  | -2.586303 | 0.040204  |
| 1 | 1.199120  | -3.454435 | 0.462737  |

**Table 54.** TS C<sub>14</sub>H<sub>14</sub> optimized with M06-2X:

|   |          |           |           |
|---|----------|-----------|-----------|
| 6 | 1.474615 | -1.459049 | -0.288679 |
| 1 | 0.973097 | -0.631214 | -0.771842 |
| 6 | 2.817288 | -1.252185 | 0.017098  |
| 1 | 3.422150 | -2.115517 | 0.285765  |
| 6 | 3.447295 | 0.000001  | 0.000005  |
| 1 | 4.533407 | 0.000001  | 0.000017  |
| 6 | 2.817289 | 1.252186  | -0.017102 |
| 1 | 3.422147 | 2.115516  | -0.285780 |
| 6 | 1.474615 | 1.459048  | 0.288675  |
| 1 | 0.973096 | 0.631211  | 0.771834  |

|   |           |           |           |
|---|-----------|-----------|-----------|
| 6 | 0.702060  | 2.568641  | -0.040733 |
| 1 | 1.202578  | 3.426056  | -0.482630 |
| 6 | -0.702061 | 2.568641  | -0.040733 |
| 1 | -1.202579 | 3.426055  | -0.482630 |
| 6 | -1.474615 | 1.459047  | 0.288674  |
| 1 | -0.973096 | 0.631210  | 0.771832  |
| 6 | -2.817289 | 1.252185  | -0.017102 |
| 1 | -3.422147 | 2.115516  | -0.285779 |
| 6 | -3.447295 | 0.000001  | 0.000005  |
| 1 | -4.533408 | 0.000000  | 0.000016  |
| 6 | -2.817287 | -1.252185 | 0.017098  |
| 1 | -3.422149 | -2.115518 | 0.285764  |
| 6 | -1.474614 | -1.459048 | -0.288677 |
| 1 | -0.973095 | -0.631212 | -0.771838 |
| 6 | -0.702059 | -2.568641 | 0.040735  |
| 1 | -1.202577 | -3.426051 | 0.482640  |
| 6 | 0.702060  | -2.568641 | 0.040735  |
| 1 | 1.202577  | -3.426051 | 0.482641  |

**Table 55.** C<sub>14</sub>H<sub>14</sub> triplet optimized with UHF:

|   |           |           |           |
|---|-----------|-----------|-----------|
| 6 | -1.437809 | -1.522156 | 0.209391  |
| 1 | -0.906104 | -0.723193 | 0.676282  |
| 6 | -2.768825 | -1.271865 | -0.105910 |
| 1 | -3.387217 | -2.093373 | -0.432984 |
| 6 | -3.397672 | 0.000803  | -0.000263 |
| 1 | -4.475211 | 0.001162  | -0.000640 |
| 6 | -2.768113 | 1.272975  | 0.105518  |
| 1 | -3.386386 | 2.095122  | 0.431192  |
| 6 | -1.436456 | 1.522358  | -0.208394 |
| 1 | -0.904557 | 0.722724  | -0.673907 |
| 6 | -0.679630 | 2.718310  | 0.038892  |
| 1 | -1.207067 | 3.609703  | 0.338268  |
| 6 | 0.674439  | 2.757953  | -0.041576 |
| 1 | 1.190123  | 3.679777  | 0.168116  |
| 6 | 1.494227  | 1.548360  | -0.333215 |
| 1 | 1.051887  | 0.809877  | -0.972468 |
| 6 | 2.723549  | 1.262556  | 0.177056  |
| 1 | 3.263568  | 2.032029  | 0.708465  |
| 6 | 3.388511  | -0.000853 | -0.000266 |
| 1 | 4.466068  | -0.000886 | -0.001051 |
| 6 | 2.723285  | -1.263827 | -0.176541 |
| 1 | 3.263639  | -2.034408 | -0.705986 |
| 6 | 1.492876  | -1.548472 | 0.332654  |
| 1 | 1.050220  | -0.809011 | 0.970491  |
| 6 | 0.672846  | -2.757924 | 0.041296  |
| 1 | 1.188430  | -3.679714 | -0.168826 |
| 6 | -0.681015 | -2.718264 | -0.038492 |



|   |           |           |           |
|---|-----------|-----------|-----------|
| 1 | -1.208669 | -3.609535 | -0.337851 |
|---|-----------|-----------|-----------|

**Table 56.** C<sub>14</sub>H<sub>14</sub> triplet optimized with UB3LYP:

|   |           |           |           |
|---|-----------|-----------|-----------|
| 6 | -1.418957 | 1.494175  | -0.217200 |
| 1 | -0.882417 | 0.639069  | -0.600813 |
| 6 | -2.791962 | 1.280860  | 0.042203  |
| 1 | -3.407175 | 2.148931  | 0.271019  |
| 6 | -3.414369 | 0.050107  | 0.031571  |
| 1 | -4.495567 | 0.034230  | 0.139661  |
| 6 | -2.756890 | -1.243882 | -0.145026 |
| 1 | -3.300601 | -1.992712 | -0.720271 |
| 6 | -1.524515 | -1.542600 | 0.328024  |
| 1 | -1.058072 | -0.795250 | 0.959542  |
| 6 | -0.715315 | -2.704335 | 0.012699  |
| 1 | -1.219109 | -3.611245 | -0.308943 |
| 6 | 0.666092  | -2.660738 | -0.030384 |
| 1 | 1.192729  | -3.551519 | -0.365185 |
| 6 | 1.418956  | -1.494175 | 0.217200  |
| 1 | 0.882416  | -0.639070 | 0.600814  |
| 6 | 2.791961  | -1.280860 | -0.042203 |
| 1 | 3.407175  | -2.148931 | -0.271018 |
| 6 | 3.414369  | -0.050107 | -0.031571 |
| 1 | 4.495567  | -0.034230 | -0.139660 |
| 6 | 2.756890  | 1.243882  | 0.145026  |
| 1 | 3.300601  | 1.992712  | 0.720271  |
| 6 | 1.524516  | 1.542600  | -0.328024 |
| 1 | 1.058073  | 0.795250  | -0.959543 |
| 6 | 0.715315  | 2.704335  | -0.012700 |
| 1 | 1.219109  | 3.611245  | 0.308942  |
| 6 | -0.666092 | 2.660738  | 0.030383  |
| 1 | -1.192728 | 3.551519  | 0.365184  |

**Table 57.** C<sub>14</sub>H<sub>14</sub> triplet optimized with UCAM-B3LYP:

|   |           |           |           |
|---|-----------|-----------|-----------|
| 6 | 1.539914  | -1.537006 | -0.346495 |
| 1 | 1.092331  | -0.816823 | -1.021442 |
| 6 | 2.736553  | -1.217966 | 0.169015  |
| 1 | 3.252909  | -1.936566 | 0.803007  |
| 6 | 3.392864  | 0.076167  | -0.031246 |
| 1 | 4.471599  | 0.063616  | -0.152880 |
| 6 | 2.762047  | 1.290450  | -0.046779 |
| 1 | 3.364448  | 2.166304  | -0.275191 |
| 6 | 1.386213  | 1.487848  | 0.208214  |
| 1 | 0.851254  | 0.627473  | 0.579892  |
| 6 | 0.639520  | 2.655159  | -0.031398 |
| 1 | 1.169391  | 3.545179  | -0.360169 |
| 6 | -0.732934 | 2.702030  | 0.021308  |

|   |           |           |           |
|---|-----------|-----------|-----------|
| 1 | -1.241023 | 3.608693  | -0.290403 |
| 6 | -1.539919 | 1.537009  | 0.346501  |
| 1 | -1.092345 | 0.816829  | 1.021457  |
| 6 | -2.736551 | 1.217967  | -0.169023 |
| 1 | -3.252898 | 1.936565  | -0.803024 |
| 6 | -3.392863 | -0.076167 | 0.031231  |
| 1 | -4.471600 | -0.063615 | 0.152854  |
| 6 | -2.762047 | -1.290451 | 0.046771  |
| 1 | -3.364451 | -2.166303 | 0.275181  |
| 6 | -1.386211 | -1.487851 | -0.208210 |
| 1 | -0.851249 | -0.627478 | -0.579890 |
| 6 | -0.639520 | -2.655161 | 0.031409  |
| 1 | -1.169391 | -3.545180 | 0.360181  |
| 6 | 0.732934  | -2.702028 | -0.021298 |
| 1 | 1.241025  | -3.608691 | 0.290415  |

**Table 58.** C<sub>14</sub>H<sub>14</sub> triplet optimized with UM06-2X:

|   |           |           |           |
|---|-----------|-----------|-----------|
| 6 | -1.341137 | 1.487626  | -0.204526 |
| 1 | -0.823496 | 0.617757  | -0.583803 |
| 6 | -2.725554 | 1.330973  | 0.049681  |
| 1 | -3.297371 | 2.227316  | 0.277980  |
| 6 | -3.397069 | 0.137238  | 0.025220  |
| 1 | -4.476684 | 0.156742  | 0.135706  |
| 6 | -2.768803 | -1.170682 | -0.17334  |
| 1 | -3.289458 | -1.882636 | -0.811510 |
| 6 | -1.578940 | -1.506126 | 0.356671  |
| 1 | -1.129569 | -0.793893 | 1.041726  |
| 6 | -0.790934 | -2.684365 | 0.025804  |
| 1 | -1.314217 | -3.582810 | -0.284751 |
| 6 | 0.581453  | -2.651220 | -0.033493 |
| 1 | 1.105044  | -3.543847 | -0.365535 |
| 6 | 1.341140  | -1.487621 | 0.204527  |
| 1 | 0.823504  | -0.617743 | 0.583792  |
| 6 | 2.725556  | -1.330973 | -0.049687 |
| 1 | 3.297371  | -2.227317 | -0.277984 |
| 6 | 3.397071  | -0.137238 | -0.025237 |
| 1 | 4.476685  | -0.156741 | -0.135735 |
| 6 | 2.768804  | 1.170681  | 0.17333   |
| 1 | 3.28947   | 1.882638  | 0.811487  |
| 6 | 1.578932  | 1.506120  | -0.356663 |
| 1 | 1.129546  | 0.793880  | -1.041703 |
| 6 | 0.790934  | 2.684363  | -0.025792 |
| 1 | 1.314221  | 3.582808  | 0.28476   |
| 6 | -0.581452 | 2.651223  | 0.033508  |
| 1 | -1.105042 | 3.543849  | 0.365553  |

**Table 59.** C<sub>16</sub>H<sub>16</sub> S<sub>4</sub> singlet optimized with HF:

|   |           |           |           |
|---|-----------|-----------|-----------|
| 6 | -0.000688 | 2.372164  | 0.046538  |
| 6 | 0.000688  | -2.372164 | 0.046538  |
| 6 | -2.372164 | -0.000688 | -0.046538 |
| 6 | 2.372164  | 0.000688  | -0.046538 |
| 6 | -1.204276 | 2.912613  | -0.108855 |
| 6 | 1.204276  | -2.912613 | -0.108855 |
| 6 | -2.912613 | -1.204276 | 0.108855  |
| 6 | 2.912613  | 1.204276  | 0.108855  |
| 6 | -2.458735 | 2.442074  | 0.504684  |
| 6 | 2.458735  | -2.442074 | 0.504684  |
| 6 | -2.442074 | -2.458735 | -0.504684 |
| 6 | 2.442074  | 2.458735  | -0.504684 |
| 6 | -2.942909 | 1.204276  | 0.558062  |
| 6 | 2.942909  | -1.204276 | 0.558062  |
| 6 | -1.204276 | -2.942909 | -0.558062 |
| 6 | 1.204276  | 2.942909  | -0.558062 |
| 1 | 0.117108  | 1.505960  | 0.671751  |
| 1 | -0.117108 | -1.505960 | 0.671751  |
| 1 | -1.505960 | 0.117108  | -0.671751 |
| 1 | 1.505960  | -0.117108 | -0.671751 |
| 1 | -1.291686 | 3.816885  | -0.693298 |
| 1 | 1.291686  | -3.816885 | -0.693298 |
| 1 | -3.816885 | -1.291686 | 0.693298  |
| 1 | 3.816885  | 1.291686  | 0.693298  |
| 1 | -3.062456 | 3.222309  | 0.941550  |
| 1 | 3.062456  | -3.222309 | 0.941550  |
| 1 | -3.222309 | -3.062456 | -0.941550 |
| 1 | 3.222309  | 3.062456  | -0.941550 |
| 1 | -3.879930 | 1.062610  | 1.072132  |
| 1 | 3.879930  | -1.062610 | 1.072132  |
| 1 | -1.062610 | -3.879930 | -1.072132 |
| 1 | 1.062610  | 3.879930  | -1.072132 |

**Table 60.** C<sub>16</sub>H<sub>16</sub> S<sub>4</sub> singlet optimized with B3LYP:

|   |           |           |           |
|---|-----------|-----------|-----------|
| 6 | 0.006911  | 2.365967  | 0.028014  |
| 6 | -0.006911 | -2.365967 | 0.028014  |
| 6 | -2.365967 | 0.006911  | -0.028014 |
| 6 | 2.365967  | -0.006911 | -0.028014 |
| 6 | -1.195834 | 2.968721  | -0.120359 |
| 6 | 1.195834  | -2.968721 | -0.120359 |
| 6 | -2.968721 | -1.195834 | 0.120359  |
| 6 | 2.968721  | 1.195834  | 0.120359  |
| 6 | -2.500065 | 2.500065  | 0.318535  |
| 6 | 2.500065  | -2.500065 | 0.318535  |
| 6 | -2.500065 | -2.500065 | -0.318535 |
| 6 | 2.500065  | 2.500065  | -0.318535 |
| 6 | -2.988269 | 1.238664  | 0.399992  |

|   |           |           |           |
|---|-----------|-----------|-----------|
| 6 | 2.988269  | -1.238664 | 0.399992  |
| 6 | -1.238664 | -2.988269 | -0.399992 |
| 6 | 1.238664  | 2.988269  | -0.399992 |
| 1 | 0.070275  | 1.416151  | 0.546210  |
| 1 | -0.070275 | -1.416151 | 0.546210  |
| 1 | -1.416151 | 0.070275  | -0.546210 |
| 1 | 1.416151  | -0.070275 | -0.546210 |
| 1 | -1.198004 | 3.960091  | -0.572901 |
| 1 | 1.198004  | -3.960091 | -0.572901 |
| 1 | -3.960091 | -1.198004 | 0.572901  |
| 1 | 3.960091  | 1.198004  | 0.572901  |
| 1 | -3.189060 | 3.296414  | 0.591208  |
| 1 | 3.189060  | -3.296414 | 0.591208  |
| 1 | -3.296414 | -3.189060 | -0.591208 |
| 1 | 3.296414  | 3.189060  | -0.591208 |
| 1 | -3.998023 | 1.132409  | 0.790844  |
| 1 | 3.998023  | -1.132409 | 0.790844  |
| 1 | -1.132409 | -3.998023 | -0.790844 |
| 1 | 1.132409  | 3.998023  | -0.790844 |

**Table 61.** C<sub>16</sub>H<sub>16</sub> S<sub>4</sub> singlet optimized with CAM-B3LYP:

|   |           |           |           |
|---|-----------|-----------|-----------|
| 6 | -0.002499 | 2.349328  | 0.025049  |
| 6 | 0.002499  | -2.349328 | 0.025049  |
| 6 | -2.349328 | -0.002499 | -0.025049 |
| 6 | 2.349328  | 0.002499  | -0.025049 |
| 6 | -1.205495 | 2.924731  | -0.111121 |
| 6 | 1.205495  | -2.924731 | -0.111121 |
| 6 | -2.924731 | -1.205495 | 0.111121  |
| 6 | 2.924731  | 1.205495  | 0.111121  |
| 6 | -2.474403 | 2.458611  | 0.437036  |
| 6 | 2.474403  | -2.458611 | 0.437036  |
| 6 | -2.458611 | -2.474403 | -0.437036 |
| 6 | 2.458611  | 2.474403  | -0.437036 |
| 6 | -2.948620 | 1.205495  | 0.509360  |
| 6 | 2.948620  | -1.205495 | 0.509360  |
| 6 | -1.205495 | -2.948620 | -0.509360 |
| 6 | 1.205495  | 2.948620  | -0.509360 |
| 1 | 0.095834  | 1.439856  | 0.606276  |
| 1 | -0.095834 | -1.439856 | 0.606276  |
| 1 | -1.439856 | 0.095834  | -0.606276 |
| 1 | 1.439856  | -0.095834 | -0.606276 |
| 1 | -1.251245 | 3.877033  | -0.637091 |
| 1 | 1.251245  | -3.877033 | -0.637091 |
| 1 | -3.877033 | -1.251245 | 0.637091  |
| 1 | 3.877033  | 1.251245  | 0.637091  |
| 1 | -3.124585 | 3.248317  | 0.804458  |
| 1 | 3.124585  | -3.248317 | 0.804458  |

|   |           |           |           |
|---|-----------|-----------|-----------|
| 1 | -3.248317 | -3.124585 | -0.804458 |
| 1 | 3.248317  | 3.124585  | -0.804458 |
| 1 | -3.919988 | 1.069717  | 0.977682  |
| 1 | 3.919988  | -1.069717 | 0.977682  |
| 1 | -1.069717 | -3.919988 | -0.977682 |
| 1 | 1.069717  | 3.919988  | -0.977682 |

**Table 62.** C<sub>16</sub>H<sub>16</sub> S<sub>4</sub> singlet optimized with M06-2X:

|   |           |           |           |
|---|-----------|-----------|-----------|
| 6 | 0.000259  | 2.328381  | 0.010056  |
| 6 | -0.000259 | -2.328381 | 0.010056  |
| 6 | -2.328381 | 0.000259  | -0.010056 |
| 6 | 2.328381  | -0.000259 | -0.010056 |
| 6 | -1.203517 | 2.910973  | -0.119383 |
| 6 | 1.203517  | -2.910973 | -0.119383 |
| 6 | -2.910973 | -1.203517 | 0.119383  |
| 6 | 2.910973  | 1.203517  | 0.119383  |
| 6 | -2.456612 | 2.456612  | 0.477467  |
| 6 | 2.456612  | -2.456612 | 0.477467  |
| 6 | -2.456612 | -2.456612 | -0.477467 |
| 6 | 2.456612  | 2.456612  | -0.477467 |
| 6 | -2.919065 | 1.197387  | 0.563943  |
| 6 | 2.919065  | -1.197387 | 0.563943  |
| 6 | -1.197387 | -2.919065 | -0.563943 |
| 6 | 1.197387  | 2.919065  | -0.563943 |
| 1 | 0.105024  | 1.434937  | 0.618737  |
| 1 | -0.105024 | -1.434937 | 0.618737  |
| 1 | -1.434937 | 0.105024  | -0.618737 |
| 1 | 1.434937  | -0.105024 | -0.618737 |
| 1 | -1.256262 | 3.849431  | -0.669337 |
| 1 | 1.256262  | -3.849431 | -0.669337 |
| 1 | -3.849431 | -1.256262 | 0.669337  |
| 1 | 3.849431  | 1.256262  | 0.669337  |
| 1 | -3.093928 | 3.245882  | 0.867544  |
| 1 | 3.093928  | -3.245882 | 0.867544  |
| 1 | -3.245882 | -3.093928 | -0.867544 |
| 1 | 3.245882  | 3.093928  | -0.867544 |
| 1 | -3.871401 | 1.047513  | 1.066440  |
| 1 | 3.871401  | -1.047513 | 1.066440  |
| 1 | -1.047513 | -3.871401 | -1.066440 |
| 1 | 1.047513  | 3.871401  | -1.066440 |

**Table 63.** C<sub>16</sub>H<sub>16</sub> C<sub>1</sub> singlet optimized with HF:

|   |           |          |           |
|---|-----------|----------|-----------|
| 6 | 0.016383  | 2.256423 | 0.042598  |
| 6 | 1.330191  | 2.895499 | -0.028018 |
| 6 | -1.174733 | 2.848428 | 0.036999  |
| 6 | 2.475057  | 2.215747 | -0.113669 |

|   |           |           |           |
|---|-----------|-----------|-----------|
| 6 | -2.432404 | 2.085373  | 0.167594  |
| 6 | 2.547335  | 0.756832  | -0.283467 |
| 6 | -2.568417 | 0.834725  | -0.260390 |
| 6 | 3.548379  | -0.033379 | 0.089805  |
| 6 | -3.708117 | -0.055089 | -0.014178 |
| 6 | 3.558237  | -1.499510 | -0.084032 |
| 6 | -3.645500 | -1.386463 | -0.047643 |
| 6 | 2.523539  | -2.334042 | 0.017029  |
| 6 | -2.420938 | -2.183409 | -0.269744 |
| 6 | 1.162811  | -1.951459 | 0.410545  |
| 6 | -1.262456 | -1.930871 | 0.329693  |
| 6 | 0.034045  | -2.529099 | 0.007999  |
| 1 | 0.029143  | 1.190639  | 0.162619  |
| 1 | 1.364376  | 3.969791  | 0.046637  |
| 1 | -1.247289 | 3.923510  | -0.017228 |
| 1 | 3.406997  | 2.754191  | -0.065832 |
| 1 | -3.242975 | 2.570627  | 0.689262  |
| 1 | 1.706662  | 0.298783  | -0.768681 |
| 1 | -1.758521 | 0.399216  | -0.815115 |
| 1 | 4.435289  | 0.399563  | 0.527473  |
| 1 | -4.656348 | 0.408306  | 0.205362  |
| 1 | 4.517300  | -1.926692 | -0.329940 |
| 1 | -4.561030 | -1.940859 | 0.084424  |
| 1 | 2.689696  | -3.374361 | -0.210659 |
| 1 | -2.492729 | -2.995978 | -0.977433 |
| 1 | 1.087396  | -1.085618 | 1.046192  |
| 1 | -1.232696 | -1.147969 | 1.069074  |
| 1 | 0.054254  | -3.381378 | -0.652861 |

**Table 64.** C<sub>16</sub>H<sub>16</sub> C<sub>1</sub> singlet optimized with B3LYP:

|   |           |           |           |
|---|-----------|-----------|-----------|
| 6 | 0.001441  | 2.277533  | -0.034996 |
| 6 | 1.299313  | 2.905070  | -0.037475 |
| 6 | -1.215405 | 2.866845  | 0.037889  |
| 6 | 2.470431  | 2.211159  | -0.064425 |
| 6 | -2.461518 | 2.111486  | 0.128053  |
| 6 | 2.549289  | 0.773959  | -0.223612 |
| 6 | -2.574510 | 0.807994  | -0.215776 |
| 6 | 3.600674  | -0.028946 | 0.061021  |
| 6 | -3.706691 | -0.066346 | -0.006168 |
| 6 | 3.599185  | -1.480763 | -0.084082 |
| 6 | -3.650589 | -1.422724 | -0.051695 |
| 6 | 2.536443  | -2.322033 | -0.002503 |
| 6 | -2.443978 | -2.229350 | -0.220379 |
| 6 | 1.191393  | -1.939661 | 0.377481  |
| 6 | -1.241648 | -1.930028 | 0.321676  |
| 6 | 0.033345  | -2.539941 | 0.014078  |
| 1 | 0.011521  | 1.194910  | -0.022340 |

|   |           |           |           |
|---|-----------|-----------|-----------|
| 1 | 1.336190  | 3.987911  | 0.048031  |
| 1 | -1.282867 | 3.950785  | 0.097992  |
| 1 | 3.403345  | 2.756095  | 0.053443  |
| 1 | -3.318883 | 2.628309  | 0.553852  |
| 1 | 1.670148  | 0.294477  | -0.634191 |
| 1 | -1.717052 | 0.336646  | -0.682636 |
| 1 | 4.533486  | 0.422124  | 0.395694  |
| 1 | -4.669977 | 0.399365  | 0.188405  |
| 1 | 4.567462  | -1.929203 | -0.292870 |
| 1 | -4.589137 | -1.967825 | 0.016279  |
| 1 | 2.703416  | -3.369692 | -0.241116 |
| 1 | -2.535146 | -3.119607 | -0.841508 |
| 1 | 1.111362  | -1.038139 | 0.979949  |
| 1 | -1.193952 | -1.090097 | 1.010023  |
| 1 | 0.047036  | -3.421593 | -0.623533 |

**Table 65.** C<sub>16</sub>H<sub>16</sub> C<sub>1</sub> singlet optimized with CAM-B3LYP:

|   |           |           |           |
|---|-----------|-----------|-----------|
| 6 | 0.003504  | 2.247989  | -0.004428 |
| 6 | 1.303370  | 2.884897  | -0.040807 |
| 6 | -1.198472 | 2.841888  | 0.045247  |
| 6 | 2.463481  | 2.202516  | -0.093814 |
| 6 | -2.446775 | 2.085971  | 0.154184  |
| 6 | 2.541211  | 0.758645  | -0.251032 |
| 6 | -2.568918 | 0.809145  | -0.235033 |
| 6 | 3.577394  | -0.029642 | 0.070177  |
| 6 | -3.703450 | -0.068445 | -0.011284 |
| 6 | 3.583767  | -1.484173 | -0.077093 |
| 6 | -3.644143 | -1.411958 | -0.052702 |
| 6 | 2.528812  | -2.313808 | 0.016079  |
| 6 | -2.426951 | -2.202631 | -0.241663 |
| 6 | 1.181535  | -1.917770 | 0.391519  |
| 6 | -1.245914 | -1.902968 | 0.317348  |
| 6 | 0.037227  | -2.506194 | 0.011319  |
| 1 | 0.014422  | 1.167008  | 0.052052  |
| 1 | 1.332270  | 3.967648  | 0.036451  |
| 1 | -1.262756 | 3.926778  | 0.062630  |
| 1 | 3.399241  | 2.746938  | -0.009899 |
| 1 | -3.286381 | 2.585401  | 0.631086  |
| 1 | 1.675540  | 0.280714  | -0.690322 |
| 1 | -1.730553 | 0.354379  | -0.749765 |
| 1 | 4.492727  | 0.424506  | 0.443564  |
| 1 | -4.662071 | 0.400030  | 0.193464  |
| 1 | 4.550348  | -1.929519 | -0.294542 |
| 1 | -4.573552 | -1.966311 | 0.042490  |
| 1 | 2.687576  | -3.365440 | -0.205112 |
| 1 | -2.501020 | -3.072373 | -0.891462 |
| 1 | 1.105743  | -1.023492 | 1.004061  |

|   |           |           |           |
|---|-----------|-----------|-----------|
| 1 | -1.210618 | -1.074699 | 1.019516  |
| 1 | 0.055018  | -3.382336 | -0.632309 |

**Table 66.** C<sub>16</sub>H<sub>16</sub> C<sub>1</sub> singlet optimized with M06-2X:

|   |           |           |           |
|---|-----------|-----------|-----------|
| 6 | 0.024008  | 2.208596  | -0.003156 |
| 6 | 1.321877  | 2.856048  | -0.046287 |
| 6 | -1.171587 | 2.822297  | 0.051168  |
| 6 | 2.487453  | 2.179944  | -0.105956 |
| 6 | -2.429162 | 2.081726  | 0.170741  |
| 6 | 2.562964  | 0.734477  | -0.275354 |
| 6 | -2.572049 | 0.815485  | -0.253670 |
| 6 | 3.588567  | -0.054355 | 0.087191  |
| 6 | -3.717743 | -0.048525 | -0.012591 |
| 6 | 3.584533  | -1.510226 | -0.065564 |
| 6 | -3.669003 | -1.395079 | -0.050335 |
| 6 | 2.506253  | -2.314503 | 0.018559  |
| 6 | -2.446830 | -2.180286 | -0.239626 |
| 6 | 1.167009  | -1.881605 | 0.392317  |
| 6 | -1.265561 | -1.855273 | 0.313457  |
| 6 | 0.016570  | -2.464285 | 0.010490  |
| 1 | 0.029207  | 1.125069  | 0.063803  |
| 1 | 1.339873  | 3.938867  | 0.037273  |
| 1 | -1.215392 | 3.908552  | 0.066984  |
| 1 | 3.423199  | 2.724003  | -0.016899 |
| 1 | -3.252400 | 2.573915  | 0.682888  |
| 1 | 1.715140  | 0.260128  | -0.757032 |
| 1 | -1.753656 | 0.366399  | -0.808092 |
| 1 | 4.488138  | 0.398198  | 0.499211  |
| 1 | -4.667586 | 0.433022  | 0.203528  |
| 1 | 4.544600  | -1.972822 | -0.275545 |
| 1 | -4.598376 | -1.947353 | 0.055165  |
| 1 | 2.634370  | -3.370220 | -0.204429 |
| 1 | -2.511603 | -3.063082 | -0.872602 |
| 1 | 1.104172  | -0.982075 | 1.001654  |
| 1 | -1.234471 | -1.014161 | 1.003503  |
| 1 | 0.030995  | -3.345056 | -0.627712 |

**Table 67.** C<sub>16</sub>H<sub>16</sub> triplet optimized with UHF:

|   |           |           |           |
|---|-----------|-----------|-----------|
| 6 | 0.000001  | 2.329827  | -0.100504 |
| 6 | 1.256510  | 2.913567  | -0.004274 |
| 6 | -1.256567 | 2.913470  | -0.004431 |
| 6 | 2.436565  | 2.156083  | 0.039670  |
| 6 | -2.436748 | 2.156092  | 0.039586  |
| 6 | 2.509769  | 0.786553  | -0.182550 |
| 6 | -2.509983 | 0.786493  | -0.182170 |
| 6 | 3.608304  | -0.040525 | 0.032617  |



|   |           |           |           |
|---|-----------|-----------|-----------|
| 6 | -3.608497 | -0.040637 | 0.032431  |
| 6 | 3.591475  | -1.435273 | -0.049847 |
| 6 | -3.591340 | -1.435462 | -0.049900 |
| 6 | 2.485566  | -2.294467 | -0.092644 |
| 6 | -2.485410 | -2.294612 | -0.092365 |
| 6 | 1.195135  | -1.950907 | 0.296694  |
| 6 | -1.194916 | -1.951003 | 0.296920  |
| 6 | 0.000098  | -2.602114 | 0.008026  |
| 1 | 0.000118  | 1.263250  | -0.181965 |
| 1 | 1.332081  | 3.978478  | 0.134901  |
| 1 | -1.332131 | 3.978421  | 0.134459  |
| 1 | 3.343769  | 2.673227  | 0.309639  |
| 1 | -3.343924 | 2.673454  | 0.309200  |
| 1 | 1.635261  | 0.309341  | -0.569761 |
| 1 | -1.635253 | 0.309232  | -0.568744 |
| 1 | 4.559554  | 0.422659  | 0.242447  |
| 1 | -4.559947 | 0.422346  | 0.241754  |
| 1 | 4.557012  | -1.910001 | -0.119992 |
| 1 | -4.556812 | -1.910294 | -0.120300 |
| 1 | 2.660076  | -3.298752 | -0.443760 |
| 1 | -2.659891 | -3.298934 | -0.443387 |
| 1 | 1.095002  | -1.040694 | 0.859219  |
| 1 | -1.094733 | -1.040871 | 0.859554  |
| 1 | 0.000048  | -3.513374 | -0.566818 |

**Table 68.** C<sub>16</sub>H<sub>16</sub> triplet optimized with UB3LYP:

|   |           |           |           |
|---|-----------|-----------|-----------|
| 6 | -0.000480 | 2.313217  | -0.106583 |
| 6 | 1.259852  | 2.906144  | 0.006812  |
| 6 | -1.260948 | 2.905919  | 0.006758  |
| 6 | 2.461739  | 2.180113  | 0.032564  |
| 6 | -2.462646 | 2.179574  | 0.032616  |
| 6 | 2.542688  | 0.791789  | -0.167499 |
| 6 | -2.543089 | 0.791243  | -0.167296 |
| 6 | 3.637362  | -0.040106 | 0.016291  |
| 6 | -3.637467 | -0.041178 | 0.016171  |
| 6 | 3.613928  | -1.453605 | -0.089518 |
| 6 | -3.613306 | -1.454632 | -0.089375 |
| 6 | 2.501446  | -2.300923 | -0.086627 |
| 6 | -2.500555 | -2.301568 | -0.086632 |
| 6 | 1.208148  | -1.947713 | 0.326798  |
| 6 | -1.207189 | -1.947910 | 0.326463  |
| 6 | 0.000495  | -2.584155 | 0.032122  |
| 1 | -0.000416 | 1.237524  | -0.219003 |
| 1 | 1.314658  | 3.981218  | 0.157321  |
| 1 | -1.315976 | 3.981020  | 0.156993  |
| 1 | 3.373662  | 2.719975  | 0.274889  |
| 1 | -3.374698 | 2.719236  | 0.274935  |
| 1 | 1.642654  | 0.305979  | -0.516410 |
| 1 | -1.642754 | 0.305763  | -0.515908 |
| 1 | 4.603210  | 0.419629  | 0.217426  |
| 1 | -4.603643 | 0.418118  | 0.216696  |
| 1 | 4.580861  | -1.933417 | -0.217435 |

|   |           |           |           |
|---|-----------|-----------|-----------|
| 1 | -4.580063 | -1.934906 | -0.216949 |
| 1 | 2.659989  | -3.319842 | -0.434654 |
| 1 | -2.658803 | -3.320620 | -0.434394 |
| 1 | 1.118521  | -1.028720 | 0.897418  |
| 1 | -1.117780 | -1.028704 | 0.896776  |
| 1 | 0.000724  | -3.499512 | -0.556089 |

**Table 69.** C<sub>16</sub>H<sub>16</sub> triplet optimized with UCAM-B3LYP:

|   |           |           |           |
|---|-----------|-----------|-----------|
| 6 | -0.000253 | 2.259726  | -0.129711 |
| 6 | 1.254332  | 2.868412  | 0.025538  |
| 6 | -1.254860 | 2.868318  | 0.025574  |
| 6 | 2.450892  | 2.184370  | 0.022780  |
| 6 | -2.451331 | 2.184126  | 0.022828  |
| 6 | 2.556996  | 0.775321  | -0.229381 |
| 6 | -2.557167 | 0.775086  | -0.229419 |
| 6 | 3.597679  | -0.031741 | 0.068165  |
| 6 | -3.597659 | -0.032222 | 0.068146  |
| 6 | 3.591527  | -1.472041 | -0.126704 |
| 6 | -3.591216 | -1.472530 | -0.126722 |
| 6 | 2.504077  | -2.292087 | -0.074339 |
| 6 | -2.503645 | -2.292419 | -0.074346 |
| 6 | 1.203946  | -1.903272 | 0.350442  |
| 6 | -1.203552 | -1.903459 | 0.350470  |
| 6 | 0.000233  | -2.521297 | 0.046040  |
| 1 | -0.000230 | 1.192873  | -0.301644 |
| 1 | 1.278406  | 3.935184  | 0.230160  |
| 1 | -1.279041 | 3.935080  | 0.230242  |
| 1 | 3.357518  | 2.724164  | 0.277823  |
| 1 | -3.358026 | 2.723757  | 0.277971  |
| 1 | 1.703331  | 0.307196  | -0.700596 |
| 1 | -1.703411 | 0.307181  | -0.700686 |
| 1 | 4.512477  | 0.408427  | 0.459436  |
| 1 | -4.512538 | 0.407745  | 0.459453  |
| 1 | 4.551526  | -1.927847 | -0.349638 |
| 1 | -4.551140 | -1.928502 | -0.349638 |
| 1 | 2.640493  | -3.326262 | -0.380805 |
| 1 | -2.639917 | -3.326610 | -0.380817 |
| 1 | 1.136859  | -0.981487 | 0.918395  |
| 1 | -1.136592 | -0.981721 | 0.918506  |
| 1 | 0.000298  | -3.434925 | -0.544333 |

**Table 70.** C<sub>16</sub>H<sub>16</sub> triplet optimized with UM06-2X:

|   |           |          |           |
|---|-----------|----------|-----------|
| 6 | -0.000184 | 2.225312 | -0.109870 |
| 6 | 1.250715  | 2.849853 | 0.015868  |
| 6 | -1.251260 | 2.849810 | 0.015738  |
| 6 | 2.454454  | 2.170110 | 0.022030  |
| 6 | -2.454831 | 2.169892 | 0.021604  |
| 6 | 2.561427  | 0.766093 | -0.229549 |
| 6 | -2.561505 | 0.765760 | -0.229932 |

|   |           |           |           |
|---|-----------|-----------|-----------|
| 6 | 3.616902  | -0.036383 | 0.067574  |
| 6 | -3.616797 | -0.036822 | 0.067642  |
| 6 | 3.606773  | -1.471267 | -0.111809 |
| 6 | -3.606591 | -1.471642 | -0.111477 |
| 6 | 2.499189  | -2.277166 | -0.079065 |
| 6 | -2.498820 | -2.277445 | -0.078779 |
| 6 | 1.206050  | -1.871330 | 0.345901  |
| 6 | -1.205709 | -1.871374 | 0.345818  |
| 6 | 0.000210  | -2.486587 | 0.034683  |
| 1 | -0.000195 | 1.147994  | -0.220692 |
| 1 | 1.265036  | 3.921862  | 0.192746  |
| 1 | -1.265662 | 3.921805  | 0.192696  |
| 1 | 3.359084  | 2.712493  | 0.280010  |
| 1 | -3.359694 | 2.712044  | 0.279255  |
| 1 | 1.712665  | 0.292626  | -0.707444 |
| 1 | -1.712782 | 0.292386  | -0.708021 |
| 1 | 4.534432  | 0.415957  | 0.438244  |
| 1 | -4.534245 | 0.415569  | 0.438487  |
| 1 | 4.565756  | -1.943176 | -0.302881 |
| 1 | -4.565528 | -1.943741 | -0.302327 |
| 1 | 2.617701  | -3.311642 | -0.392717 |
| 1 | -2.617292 | -3.312031 | -0.392093 |
| 1 | 1.144621  | -0.955250 | 0.927224  |
| 1 | -1.144288 | -0.955107 | 0.926860  |
| 1 | 0.000261  | -3.392677 | -0.567617 |

**Table 71.** C<sub>18</sub>H<sub>18</sub> singlet optimized with HF:

|   |           |           |           |
|---|-----------|-----------|-----------|
| 6 | 0.027472  | -2.980306 | 0.212872  |
| 6 | 1.209013  | -3.522172 | -0.072460 |
| 1 | 1.262054  | -4.540568 | -0.424964 |
| 6 | 2.482085  | -2.787083 | 0.033903  |
| 1 | 3.370168  | -3.366202 | 0.233509  |
| 6 | 2.569237  | -1.469262 | -0.130873 |
| 1 | 1.668727  | -0.949338 | -0.397080 |
| 6 | 3.774002  | -0.646923 | -0.030336 |
| 1 | 4.720987  | -1.160758 | -0.033737 |
| 1 | 4.707966  | 1.212094  | 0.033981  |
| 6 | 3.766680  | 0.687895  | 0.030182  |
| 6 | 2.552937  | 1.496960  | 0.130342  |
| 1 | 1.657959  | 0.967023  | 0.395484  |
| 1 | 3.333403  | 3.402786  | -0.232125 |
| 6 | 2.451563  | 2.813874  | -0.033472 |
| 6 | 1.170544  | 3.535055  | 0.072817  |
| 1 | 1.212503  | 4.553768  | 0.425913  |
| 1 | 0.006870  | 1.986470  | -0.617376 |
| 6 | -0.004973 | 2.980558  | -0.213041 |
| 6 | -1.318865 | 3.578892  | 0.013592  |
| 1 | -1.340273 | 4.632682  | 0.237388  |
| 6 | -2.471787 | 2.902888  | 0.023899  |
| 1 | -3.378487 | 3.438497  | 0.251849  |

|   |           |           |           |
|---|-----------|-----------|-----------|
| 6 | -2.593013 | 1.462325  | -0.187706 |
| 1 | -1.722317 | 0.955830  | -0.558001 |
| 6 | -3.665128 | 0.714310  | 0.062589  |
| 1 | -4.587262 | 1.178466  | 0.376476  |
| 6 | -3.657089 | -0.754124 | -0.062562 |
| 1 | -4.574007 | -1.228327 | -0.376720 |
| 6 | -2.576945 | -1.490431 | 0.187932  |
| 1 | -1.711895 | -0.974553 | 0.558513  |
| 6 | -2.440017 | -2.929545 | -0.023930 |
| 1 | -3.340816 | -3.474967 | -0.251996 |
| 1 | -1.289693 | -4.646845 | -0.237752 |
| 6 | -1.279779 | -3.592925 | -0.013766 |
| 1 | 0.028487  | -1.985972 | 0.616745  |

**Table 72.** C<sub>18</sub>H<sub>18</sub> singlet optimized with B3LYP:

|   |           |           |           |
|---|-----------|-----------|-----------|
| 6 | -1.539947 | 2.550712  | -0.000116 |
| 6 | -0.776547 | 3.714831  | 0.000015  |
| 1 | -1.295799 | 4.669903  | 0.000126  |
| 6 | 0.632118  | 3.742026  | -0.000018 |
| 1 | 1.114154  | 4.716409  | -0.000134 |
| 6 | 1.439941  | 2.608291  | 0.000117  |
| 1 | 0.917289  | 1.660305  | 0.000426  |
| 6 | 2.829969  | 2.530226  | -0.000034 |
| 1 | 3.396727  | 3.457906  | -0.000179 |
| 1 | 4.643404  | 1.394406  | 0.000022  |
| 6 | 3.558580  | 1.324268  | -0.000006 |
| 6 | 2.980686  | 0.057726  | -0.000055 |
| 1 | 1.898465  | 0.036777  | -0.000221 |
| 1 | 4.693918  | -1.213539 | 0.000086  |
| 6 | 3.607192  | -1.185505 | 0.000022  |
| 6 | 2.925903  | -2.418822 | 0.000007  |
| 1 | 3.528209  | -3.323815 | -0.000038 |
| 1 | 0.981032  | -1.623643 | 0.000210  |
| 6 | 1.539947  | -2.550712 | 0.000064  |
| 6 | 0.776545  | -3.714833 | -0.000004 |
| 1 | 1.295798  | -4.669904 | -0.000054 |
| 6 | -0.632116 | -3.742028 | 0.000002  |
| 1 | -1.114153 | -4.716410 | 0.000056  |
| 6 | -1.439942 | -2.608290 | -0.000068 |
| 1 | -0.917289 | -1.660305 | -0.000219 |
| 6 | -2.829966 | -2.530227 | -0.000004 |
| 1 | -3.396725 | -3.457906 | 0.000051  |
| 6 | -3.558578 | -1.324266 | -0.000016 |
| 1 | -4.643403 | -1.394405 | -0.000062 |
| 6 | -2.980686 | -0.057726 | 0.000045  |
| 1 | -1.898465 | -0.036777 | 0.000184  |
| 6 | -3.607193 | 1.185508  | 0.000011  |

|   |           |          |           |
|---|-----------|----------|-----------|
| 1 | -4.693919 | 1.213540 | -0.000002 |
| 1 | -3.528211 | 3.323815 | 0.000184  |
| 6 | -2.925907 | 2.418822 | 0.000036  |
| 1 | -0.981033 | 1.623643 | -0.000419 |

**Table 73.** C<sub>18</sub>H<sub>18</sub> singlet (C<sub>1</sub>) optimized with CAM-B3LYP:

|   |           |           |           |
|---|-----------|-----------|-----------|
| 6 | 0.015783  | 2.962845  | -0.129637 |
| 6 | 1.223711  | 3.542681  | 0.019649  |
| 1 | 1.278408  | 4.611633  | 0.207485  |
| 6 | 2.479706  | 2.815970  | -0.038072 |
| 1 | 3.388516  | 3.402078  | -0.144462 |
| 6 | 2.568913  | 1.474234  | 0.059009  |
| 1 | 1.644617  | 0.938860  | 0.232694  |
| 6 | 3.754678  | 0.665936  | 0.001945  |
| 1 | 4.709774  | 1.182362  | -0.019068 |
| 1 | 4.701736  | -1.213816 | 0.019186  |
| 6 | 3.750126  | -0.690996 | -0.001868 |
| 6 | 2.558970  | -1.491324 | -0.058995 |
| 1 | 1.638298  | -0.949758 | -0.232726 |
| 1 | 3.365628  | -3.424611 | 0.144480  |
| 6 | 2.460765  | -2.832434 | 0.038067  |
| 6 | 1.199938  | -3.550739 | -0.019711 |
| 1 | 1.247509  | -4.620028 | -0.207575 |
| 1 | -0.002951 | -1.908621 | 0.374112  |
| 6 | -0.004109 | -2.962886 | 0.129592  |
| 6 | -1.294839 | -3.571135 | -0.029762 |
| 1 | -1.319937 | -4.643855 | -0.197383 |
| 6 | -2.468084 | -2.889462 | -0.039142 |
| 1 | -3.385536 | -3.443833 | -0.213404 |
| 6 | -2.581781 | -1.466072 | 0.114135  |
| 1 | -1.671265 | -0.939247 | 0.369149  |
| 6 | -3.689499 | -0.712715 | -0.037727 |
| 1 | -4.643061 | -1.199841 | -0.223578 |
| 6 | -3.684633 | 0.737338  | 0.037815  |
| 1 | -4.634900 | 1.230850  | 0.223695  |
| 6 | -2.571894 | 1.483246  | -0.114110 |
| 1 | -1.664952 | 0.950312  | -0.369161 |
| 6 | -2.448650 | 2.905848  | 0.039119  |
| 1 | -3.362367 | 3.466352  | 0.213379  |
| 1 | -1.288821 | 4.652541  | 0.197281  |
| 6 | -1.270875 | 3.579672  | 0.029695  |
| 1 | 0.009945  | 1.908583  | -0.374100 |

**Table 74.** C<sub>18</sub>H<sub>18</sub> singlet (C<sub>1</sub>) optimized with M06-2X:

|   |           |          |           |
|---|-----------|----------|-----------|
| 6 | -0.000344 | 2.955691 | 0.149552  |
| 6 | -1.203352 | 3.547715 | -0.020754 |

|   |           |           |           |
|---|-----------|-----------|-----------|
| 1 | -1.244559 | 4.612546  | -0.235163 |
| 6 | -2.464259 | 2.828109  | 0.051610  |
| 1 | -3.370654 | 3.411814  | 0.189902  |
| 6 | -2.556407 | 1.485525  | -0.073863 |
| 1 | -1.641070 | 0.950822  | -0.297716 |
| 6 | -3.752731 | 0.688615  | -0.001520 |
| 1 | -4.702184 | 1.215498  | 0.026086  |
| 1 | -4.708016 | -1.192831 | -0.026072 |
| 6 | -3.756023 | -0.670552 | 0.001554  |
| 6 | -2.563574 | -1.473247 | 0.073886  |
| 1 | -1.645648 | -0.942986 | 0.297717  |
| 1 | -3.387134 | -3.395572 | -0.189940 |
| 6 | -2.477934 | -2.816258 | -0.051610 |
| 6 | -1.220511 | -3.541928 | 0.020718  |
| 1 | -1.266829 | -4.606562 | 0.235064  |
| 1 | -0.014972 | -1.910650 | -0.434595 |
| 6 | -0.014690 | -2.955655 | -0.149557 |
| 6 | 1.270889  | -3.573081 | 0.037361  |
| 1 | 1.282192  | -4.641745 | 0.231848  |
| 6 | 2.451112  | -2.898272 | 0.048855  |
| 1 | 3.363568  | -3.451864 | 0.251070  |
| 6 | 2.573638  | -1.475928 | -0.128539 |
| 1 | 1.677381  | -0.942608 | -0.421567 |
| 6 | 3.690302  | -0.734311 | 0.044497  |
| 1 | 4.633414  | -1.231775 | 0.255906  |
| 6 | 3.693823  | 0.716548  | -0.044458 |
| 1 | 4.639331  | 1.209427  | -0.255906 |
| 6 | 2.580772  | 1.463574  | 0.128573  |
| 1 | 1.681939  | 0.934621  | 0.421626  |
| 6 | 2.465125  | 2.886485  | -0.048876 |
| 1 | 3.380236  | 3.435666  | -0.251121 |
| 1 | 1.304587  | 4.635547  | -0.231936 |
| 6 | 1.288165  | 3.566958  | -0.037404 |
| 1 | -0.005592 | 1.910717  | 0.434655  |

**Table 75.** C<sub>18</sub>H<sub>18</sub> TS optimized with CAM-B3LYP:

|   |           |           |           |
|---|-----------|-----------|-----------|
| 6 | 1.746946  | -2.391187 | -0.000097 |
| 6 | 1.094539  | -3.614818 | 0.000014  |
| 1 | 1.697786  | -4.518011 | 0.000108  |
| 6 | -0.299789 | -3.764908 | -0.000017 |
| 1 | -0.696994 | -4.775795 | -0.000117 |
| 6 | -1.197701 | -2.708181 | 0.000098  |
| 1 | -0.760750 | -1.719667 | 0.000369  |
| 6 | -2.583589 | -2.755327 | -0.000031 |
| 1 | -3.063929 | -3.729465 | -0.000151 |
| 1 | -4.484950 | -1.784639 | 0.000029  |
| 6 | -3.410915 | -1.623033 | -0.000006 |

|   |           |           |           |
|---|-----------|-----------|-----------|
| 6 | -2.944733 | -0.317059 | -0.000061 |
| 1 | -1.870156 | -0.201316 | -0.000227 |
| 1 | -4.762140 | 0.788860  | 0.000079  |
| 6 | -3.678326 | 0.859681  | 0.000016  |
| 6 | -3.111088 | 2.142186  | 0.000002  |
| 1 | -3.787844 | 2.991699  | -0.000040 |
| 1 | -1.109572 | 1.518357  | 0.000197  |
| 6 | -1.746946 | 2.391188  | 0.000057  |
| 6 | -1.094536 | 3.614825  | -0.000005 |
| 1 | -1.697784 | 4.518017  | -0.000054 |
| 6 | 0.299785  | 3.764913  | 0.000004  |
| 1 | 0.696991  | 4.775800  | 0.000052  |
| 6 | 1.197701  | 2.708181  | -0.000058 |
| 1 | 0.760749  | 1.719667  | -0.000197 |
| 6 | 2.583582  | 2.755326  | 0.000000  |
| 1 | 3.063924  | 3.729464  | 0.000046  |
| 6 | 3.410913  | 1.623026  | -0.000012 |
| 1 | 4.484947  | 1.784633  | -0.000064 |
| 6 | 2.944732  | 0.317059  | 0.000054  |
| 1 | 1.870156  | 0.201315  | 0.000201  |
| 6 | 3.678330  | -0.859687 | 0.000009  |
| 1 | 4.762144  | -0.788864 | -0.000016 |
| 1 | 3.787850  | -2.991699 | 0.000152  |
| 6 | 3.111095  | -2.142185 | 0.000032  |
| 1 | 1.109573  | -1.518356 | -0.000361 |

**Table 76.** C<sub>18</sub>H<sub>18</sub> TS optimized with M06-2X:

|   |           |           |           |
|---|-----------|-----------|-----------|
| 6 | -1.479250 | 2.562445  | 0.018412  |
| 6 | -0.702569 | 3.714763  | -0.004560 |
| 1 | -1.209971 | 4.675168  | -0.024924 |
| 6 | 0.702561  | 3.714767  | 0.003297  |
| 1 | 1.209960  | 4.675180  | 0.023330  |
| 6 | 1.479246  | 2.562442  | -0.019281 |
| 1 | 0.939358  | 1.627400  | -0.074465 |
| 6 | 2.865496  | 2.465745  | 0.004778  |
| 1 | 3.443691  | 3.385273  | 0.025081  |
| 1 | 4.653265  | 1.289137  | -0.020337 |
| 6 | 3.567775  | 1.248749  | -0.001714 |
| 6 | 2.958007  | 0.000007  | 0.020786  |
| 1 | 1.878184  | 0.000015  | 0.074059  |
| 1 | 4.653267  | -1.289134 | -0.019895 |
| 6 | 3.567777  | -1.248742 | -0.001287 |
| 6 | 2.865501  | -2.465737 | 0.005619  |
| 1 | 3.443696  | -3.385257 | 0.026240  |
| 1 | 0.939361  | -1.627422 | -0.073920 |
| 6 | 1.479250  | -2.562445 | -0.018412 |
| 6 | 0.702569  | -3.714763 | 0.004560  |

|   |           |           |           |
|---|-----------|-----------|-----------|
| 1 | 1.209971  | -4.675168 | 0.024924  |
| 6 | -0.702561 | -3.714767 | -0.003297 |
| 1 | -1.209960 | -4.675180 | -0.023330 |
| 6 | -1.479246 | -2.562442 | 0.019281  |
| 1 | -0.939358 | -1.627400 | 0.074465  |
| 6 | -2.865496 | -2.465745 | -0.004778 |
| 1 | -3.443691 | -3.385273 | -0.025081 |
| 6 | -3.567775 | -1.248749 | 0.001714  |
| 1 | -4.653265 | -1.289137 | 0.020337  |
| 6 | -2.958007 | -0.000007 | -0.020786 |
| 1 | -1.878184 | -0.000015 | -0.074059 |
| 6 | -3.567777 | 1.248742  | 0.001287  |
| 1 | -4.653267 | 1.289134  | 0.019895  |
| 1 | -3.443696 | 3.385257  | -0.026240 |
| 6 | -2.865501 | 2.465737  | -0.005619 |
| 1 | -0.939361 | 1.627422  | 0.073920  |

**Table 77.** C<sub>18</sub>H<sub>18</sub> triplet (C<sub>2</sub>h) optimized with UHF:

|   |           |           |           |
|---|-----------|-----------|-----------|
| 6 | 2.704232  | -1.381276 | 0.226661  |
| 6 | 3.740672  | -0.572057 | -0.099696 |
| 1 | 4.626596  | -0.980315 | -0.559985 |
| 6 | 3.674595  | 0.903940  | 0.099699  |
| 1 | 4.520493  | 1.389729  | 0.559989  |
| 6 | 2.569990  | 1.617309  | -0.226658 |
| 1 | 1.768128  | 1.073519  | -0.692673 |
| 6 | 2.348256  | 3.013393  | 0.032132  |
| 1 | 3.198634  | 3.613292  | 0.310316  |
| 1 | 1.055073  | 4.684316  | 0.227974  |
| 6 | 1.091665  | 3.626814  | 0.022166  |
| 6 | -0.131907 | 2.946323  | -0.140824 |
| 1 | -0.084644 | 1.889983  | -0.315338 |
| 1 | -1.469386 | 4.571352  | 0.227973  |
| 6 | -1.411369 | 3.514808  | 0.022166  |
| 6 | -2.608132 | 2.791586  | 0.032125  |
| 1 | -3.508710 | 3.313113  | 0.310294  |
| 1 | -1.856970 | 0.911308  | -0.692650 |
| 6 | -2.704231 | 1.381272  | -0.226660 |
| 6 | -3.740676 | 0.572058  | 0.099686  |
| 1 | -4.626609 | 0.980322  | 0.559954  |
| 6 | -3.674598 | -0.903941 | -0.099691 |
| 1 | -4.520504 | -1.389736 | -0.559962 |
| 6 | -2.569990 | -1.617304 | 0.226658  |
| 1 | -1.768122 | -1.073509 | 0.692657  |
| 6 | -2.348255 | -3.013392 | -0.032119 |
| 1 | -3.198636 | -3.613295 | -0.310288 |
| 6 | -1.091665 | -3.626812 | -0.022157 |
| 1 | -1.055074 | -4.684315 | -0.227959 |



|   |          |           |           |
|---|----------|-----------|-----------|
| 6 | 0.131911 | -2.946322 | 0.140821  |
| 1 | 0.084653 | -1.889981 | 0.315330  |
| 6 | 1.411370 | -3.514810 | -0.022174 |
| 1 | 1.469385 | -4.571353 | -0.227982 |
| 1 | 3.508709 | -3.313112 | -0.310317 |
| 6 | 2.608133 | -2.791588 | -0.032136 |
| 1 | 1.856978 | -0.911318 | 0.692669  |

**Table 78.** C<sub>18</sub>H<sub>18</sub> triplet (C<sub>2</sub>h) optimized with UB3LYP:

|   |           |           |           |
|---|-----------|-----------|-----------|
| 6 | -1.478203 | -2.608565 | 0.131302  |
| 6 | -0.718192 | -3.722402 | -0.036538 |
| 1 | -1.204202 | -4.674445 | -0.237532 |
| 6 | 0.739137  | -3.718302 | 0.036552  |
| 1 | 1.230495  | -4.667592 | 0.237565  |
| 6 | 1.492876  | -2.600213 | -0.131310 |
| 1 | 0.955902  | -1.697389 | -0.399156 |
| 6 | 2.911616  | -2.464725 | 0.016356  |
| 1 | 3.492470  | -3.369748 | 0.169820  |
| 1 | 4.660780  | -1.269044 | 0.140170  |
| 6 | 3.580501  | -1.248856 | 0.017854  |
| 6 | 2.957013  | 0.008312  | -0.073269 |
| 1 | 1.879970  | 0.005275  | -0.172096 |
| 1 | 4.653554  | 1.295250  | 0.140182  |
| 6 | 3.573405  | 1.268977  | 0.017864  |
| 6 | 2.897687  | 2.481057  | 0.016369  |
| 1 | 3.473438  | 3.389335  | 0.169836  |
| 1 | 0.946312  | 1.702738  | -0.399156 |
| 6 | 1.478206  | 2.608565  | -0.131308 |
| 6 | 0.718193  | 3.722398  | 0.036547  |
| 1 | 1.204200  | 4.674438  | 0.237561  |
| 6 | -0.739138 | 3.718299  | -0.036549 |
| 1 | -1.230493 | 4.667592  | -0.237556 |
| 6 | -1.492878 | 2.600210  | 0.131305  |
| 1 | -0.955906 | 1.697384  | 0.399147  |
| 6 | -2.911618 | 2.464726  | -0.016361 |
| 1 | -3.492471 | 3.369750  | -0.169823 |
| 6 | -3.580504 | 1.248858  | -0.017858 |
| 1 | -4.660784 | 1.269046  | -0.140172 |
| 6 | -2.957014 | -0.008309 | 0.073264  |
| 1 | -1.879971 | -0.005267 | 0.172084  |
| 6 | -3.573404 | -1.268976 | -0.017859 |
| 1 | -4.653553 | -1.295251 | -0.140169 |
| 1 | -3.473437 | -3.389334 | -0.169819 |
| 6 | -2.897684 | -2.481056 | -0.016363 |
| 1 | -0.946304 | -1.702734 | 0.399128  |

**Table 79.** C<sub>18</sub>H<sub>18</sub> triplet optimized with UCAM-B3LYP:

|   |           |           |           |
|---|-----------|-----------|-----------|
| 6 | -2.713625 | 1.252990  | 0.160621  |
| 6 | -3.749017 | 0.419170  | -0.051350 |
| 1 | -4.721311 | 0.825465  | -0.317719 |
| 6 | -3.627283 | -1.036053 | 0.050997  |
| 1 | -4.518748 | -1.598315 | 0.316557  |
| 6 | -2.467525 | -1.686118 | -0.160205 |
| 1 | -1.629762 | -1.082500 | -0.488385 |
| 6 | -2.211543 | -3.089567 | 0.016116  |
| 1 | -3.064806 | -3.737306 | 0.190147  |
| 1 | -0.875865 | -4.721656 | 0.167722  |
| 6 | -0.952179 | -3.647500 | 0.022919  |
| 6 | 0.244406  | -2.920683 | -0.084727 |
| 1 | 0.154985  | -1.850332 | -0.202705 |
| 1 | 1.648136  | -4.510691 | 0.167706  |
| 6 | 1.545027  | -3.438786 | 0.022856  |
| 6 | 2.694295  | -2.679439 | 0.015976  |
| 1 | 3.643278  | -3.176468 | 0.190051  |
| 1 | 1.787176  | -0.796984 | -0.488597 |
| 6 | 2.713560  | -1.252965 | -0.160320 |
| 6 | 3.749135  | -0.419163 | 0.051082  |
| 1 | 4.721645  | -0.825479 | 0.316605  |
| 6 | 3.627321  | 1.036047  | -0.051016 |
| 1 | 4.518797  | 1.598397  | -0.316367 |
| 6 | 2.467536  | 1.686097  | 0.160229  |
| 1 | 1.629746  | 1.082476  | 0.488337  |
| 6 | 2.211557  | 3.089576  | -0.016039 |
| 1 | 3.064791  | 3.737373  | -0.189993 |
| 6 | 0.952158  | 3.647479  | -0.022961 |
| 1 | 0.875828  | 4.721618  | -0.167849 |
| 6 | -0.244427 | 2.920635  | 0.084676  |
| 1 | -0.155015 | 1.850280  | 0.202538  |
| 6 | -1.545062 | 3.438787  | -0.022874 |
| 1 | -1.648146 | 4.510692  | -0.167744 |
| 1 | -3.643295 | 3.176477  | -0.190159 |
| 6 | -2.694332 | 2.679463  | -0.015949 |
| 1 | -1.787452 | 0.797127  | 0.489653  |

**Table 80.** C<sub>18</sub>H<sub>18</sub> triplet optimized with UM06-2X:

|   |           |           |           |
|---|-----------|-----------|-----------|
| 6 | -2.600676 | -1.469273 | -0.169230 |
| 6 | -2.462402 | -2.890453 | 0.015089  |
| 1 | -3.367246 | -3.463521 | 0.191007  |
| 6 | -1.251212 | -3.547590 | 0.022660  |
| 1 | -1.256544 | -4.625342 | 0.161661  |
| 6 | 0.000349  | -2.912741 | -0.075699 |
| 1 | 0.000216  | -1.835807 | -0.169722 |
| 6 | 1.252160  | -3.547217 | 0.022696  |
| 1 | 1.257861  | -4.624984 | 0.161574  |

|   |           |           |           |
|---|-----------|-----------|-----------|
| 1 | 3.368122  | -3.462577 | 0.191188  |
| 6 | 2.463136  | -2.889735 | 0.015265  |
| 6 | 2.601109  | -1.468446 | -0.168993 |
| 1 | 1.724851  | -0.934522 | -0.519818 |
| 1 | 4.638008  | -1.221129 | 0.328931  |
| 6 | 3.708370  | -0.729341 | 0.053694  |
| 6 | 3.708134  | 0.730389  | -0.053829 |
| 1 | 4.637436  | 1.222468  | -0.329688 |
| 1 | 1.724825  | 0.935231  | 0.520833  |
| 6 | 2.600778  | 1.469267  | 0.169395  |
| 6 | 2.462377  | 2.890355  | -0.015379 |
| 1 | 3.367098  | 3.463440  | -0.191832 |
| 6 | 1.251068  | 3.547492  | -0.022916 |
| 1 | 1.256477  | 4.625170  | -0.162495 |
| 6 | -0.000369 | 2.912744  | 0.076080  |
| 1 | -0.000240 | 1.835891  | 0.171050  |
| 6 | -1.252261 | 3.547221  | -0.022751 |
| 1 | -1.257843 | 4.624917  | -0.162158 |
| 6 | -2.463166 | 2.889804  | -0.015163 |
| 1 | -3.368163 | 3.462591  | -0.191231 |
| 6 | -2.601135 | 1.468541  | 0.169289  |
| 1 | -1.724915 | 0.934699  | 0.520326  |
| 6 | -3.708243 | 0.729348  | -0.053700 |
| 1 | -4.637804 | 1.221154  | -0.329181 |
| 1 | -4.637509 | -1.222445 | 0.328923  |
| 6 | -3.708037 | -0.730363 | 0.053618  |
| 1 | -1.724512 | -0.935234 | -0.520124 |
